# Supplementary material for: Loss of centromere function drives karyotype evolution in closely related Malassezia species
Source: eLife journal article supplement (doi:10.7554/elife.53944), 2020-01-20
Supplement: supp [file elife-53944-supp-v1.zip]

Archive with 22 entries (22 files):
- elife_poa_e53944_Figure_4_figure_supplement_2.tif
- elife_poa_e53944_Figure_3_figure_supplement_2.tif
- elife_poa_e53944_Figure_4_source_data_5.xlsx
- elife_poa_e53944_Figure_3_figure_supplement_3.tif
- elife_poa_e53944_Figure_4_source_data_1.xlsx
- elife_poa_e53944_Figure_2_figure_supplement_1.tif
- elife_poa_e53944_Figure_4_figure_supplement_1.tif
- elife_poa_e53944_Figure_4_source_data_4.xlsx
- elife_poa_e53944_Figure_3_source_data_1.xlsx
- elife_poa_e53944_Figure_6_figure_supplement_1.tif
- elife_poa_e53944_Supplementary_file_1.docx
- elife_poa_e53944_Figure_7_figure_supplement_4.tif
- elife_poa_e53944_Figure_4_source_data_6.xlsx
- elife_poa_e53944_Figure_4_source_data_3.xlsx
- elife_poa_e53944_Figure_4_source_data_2.xlsx
- elife_poa_e53944_Figure_7_figure_supplement_2.tif
- elife_poa_e53944_Figure_3_figure_supplement_1_source_data_1.xlsx
- elife_poa_e53944_Figure_3_figure_supplement_1.tif
- elife_poa_e53944_Figure_7_figure_supplement_3.tif
- elife_poa_e53944_Figure_7_figure_supplement_1.tif
- elife_poa_e53944_Figure_1_figure_supplement_1.tif
- elife_poa_e53944_Transparent_Reporting_File.pdf
