# Supplementary material for: Loss of centromere function drives karyotype evolution in closely related Malassezia species
Source: eLife journal article supplement (doi:10.7554/elife.53944), 2020-01-20
Supplement: supp [file elife-53944-supp-v1.zip › elife_poa_e53944_Figure_3_figure_supplement_1_source_data_1.xlsx]

## Sheet: Sheet1
Mtw1 enrichment at the centromeres normalized against control in M. sympodialis
	Experiment 1			Experiment 2			Experiment 3
CEN1	1.84038	1.69349	2.07053	2.12874	1.75321	1.98619	1.97246	1.87905	1.67018
CEN2	4.34694	4.19887	5.16941	4.34694	4.25748	3.91768	4.34694	3.81055	3.63008
CEN3	2.78949	2.94854	3.22657	2.25012	2.82843	2.77022	3.41054	3.24901	2.39496
CEN4	2.62079	2.25012	2.65737	3.22657	1.84038	2.11404	2.28153	2.58471	2.46229
CEN5	2.58471	2.71321	2.41162	2.77022	2.05623	2	2.58471	2.92817	2.94854
CEN6	2.36198	2.63902	2.65737	2.08493	2	2.49666	2.53151	3.73213	2.82843
CEN7	1.97246	2.08493	2.73208	2.08493	2.02792	2.54912	3.16017	2.56685	2.53151
CEN8	3.73213	3.68075	4.28709	3.73213	3.41054	3.78423	4.28709	3.68075	3.45815
