# Supplementary material for: Loss of centromere function drives karyotype evolution in closely related Malassezia species
Source: eLife journal article supplement (doi:10.7554/elife.53944), 2020-01-20
Supplement: supp [file elife-53944-supp-v1.zip › elife_poa_e53944_Figure_3_source_data_1.xlsx]

## Sheet: Sheet1
Fold difference in enrichment- figure 3C
	GFP-Mtw1 ChIP
	Experiment 1			Experiment 2			Experiment 3
Control	0	0	0	0	0	0	0	0	0
L2	0.0951694	0.0527962	0.105856	0.0788911	0.0372421	0.0226328	0.319508	0.19893	0.0407359
L1	0.0443714	0.0384459	0.0765179	0.0481083	0.0305702	0.115426	0.474269	0.0407359	0.027345
core	5.23754	5.88502	7.10932	4.2688	4.32022	5.01772	9.92832	5.9163	7.22491
R1	0.179685	0.24989	0.265528	0.14627	0.234324	0.252831	0.892115	0.257013	0.958841
	Histone H3 ChIP
	Experiment 1			Experiment 2			Experiment 3
Control	0	0	0	0	0	0	0	0	0
L2	-0.215218	-0.206764	-0.230665	-0.373072	-0.291467	-0.224627	-0.290067	-0.244479	-0.44719
L1	-0.163981	-0.156178	-0.221605	-0.372131	-0.182272	-0.125775	-0.199773	-0.18317	-0.255271
core	-0.492859	-0.499046	-0.431346	-0.394593	-0.373773	-0.493161	-0.318053	-0.483567	-0.441194
R1	-0.225501	-0.230942	-0.267925	-0.328612	-0.202558	-0.208182	-0.258739	-0.165873	-0.44241
