# Supplementary material for: Loss of centromere function drives karyotype evolution in closely related Malassezia species
Source: eLife journal article supplement (doi:10.7554/elife.53944), 2020-01-20
Supplement: supp [file elife-53944-supp-v1.zip › elife_poa_e53944_Figure_4_source_data_1.xlsx]

## Sheet: Sheet1
Enrichment of CENP-A-3xFLAG in M. furfur (% input immunoprecipitated)
Comparison between all centromeres and a control locus
	CEN1	CEN2	CEN3	CEN4	CEN5	CEN6	CEN7	CONTROL
Experiment 1	1.54964	1.39661	0.865693	2.23756	0.612138	2.71684	2.89172	0.0445611
	1.66086	1.31215	0.902456	2.20676	0.59954	2.04475	2.04475	0.0430432
	1.5932	1.34903	1.32127	1.86856	0.563281	2.55253	2.20676	0.0427459
Experiment 2	1.38696	1.25	0.758872	1.57127	0.544094	3.46277	1.78006	0.0854917
	1.31215	1.33972	0.7966	1.38696	0.435857	1.4161	1.56041	0.0866851
	1.44586	1.36787	1.07321	1.42596	0.32352	1.69575	1.69575	0.0612956
Experiment 3	1.81747	1.1344	1.07321	1.5822	0.865693	3.36808	1.54964	0.0361949
	1.53893	1.22428	0.902456	1.10338	0.791098	2.67943	1.54964	0.0349619
	1.54964	1.1744	1.15023	0.934281	0.748424	2.73573	1.10338	0.0372124
