# Supplementary material for: Loss of centromere function drives karyotype evolution in closely related Malassezia species
Source: eLife journal article supplement (doi:10.7554/elife.53944), 2020-01-20
Supplement: supp [file elife-53944-supp-v1.zip › elife_poa_e53944_Figure_4_source_data_2.xlsx]

## Sheet: Sheet1
Enrichment of CENP-A-3xFLAG in M. furfur (% input immunoprecipitated)
analysis across CEN7
	L1	core	R1	control
Experiment 1	0.303955	2.89172	0.277763	0.0445611
	0.240137	2.04475	0.246888	0.0430432
	0.250334	2.20676	0.214928	0.0427459
Experiment 2	0.103804	1.78006	0.200535	0.0854917
	0.109722	1.56041	0.195052	0.0866851
	0.104526	1.69575	0.193704	0.0612956
Experiment 3	0.264608	1.54964	0.225614	0.0361949
	0.18199	1.54964	0.230355	0.0349619
	0.203335	1.10338	0.214928	0.0372124
