# Supplementary material for: Loss of centromere function drives karyotype evolution in closely related Malassezia species
Source: eLife journal article supplement (doi:10.7554/elife.53944), 2020-01-20
Supplement: supp [file elife-53944-supp-v1.zip › elife_poa_e53944_Figure_4_source_data_3.xlsx]

## Sheet: Sheet1
Relative abundance of Histone H3 over Histone H4 in M. slooffiae
Comparison between all centromeres and a control locus
	CEN1	CEN2	CEN3	CEN4	CEN5	CEN6	CEN7	CEN8	CEN9	NC
Experiment 1	0.5	0.41466	0.444421	0.45376	0.406126	0.423373	0.395021	0.432269	0.435275	0.721965
	0.493116	0.392292	0.395021	0.444421	0.403321	0.441352	0.384219	0.360982	0.395021	0.888843
	0.812252	0.356013	0.426318	0.438303	0.397768	0.486328	0.356013	0.376312	0.373712	0.840896
Experiment 2	0.0865693	0.0921418	0.0960547	0.0908733	0.108819	0.0785633	0.105112	0.11908	0.080772	0.737135
	0.0902456	0.0915054	0.0836205	0.0921418	0.105112	0.0774817	0.0967228	0.11344	0.0967228	0.773783
	0.0890031	0.0847878	0.0890031	0.0908733	0.10083	0.0758872	0.112656	0.111105	0.0960547	0.779165
Experiment 3	0.550953	0.381565	0.334482	0.41466	0.384219	0.482968	0.334482	0.376312	0.351111	0.823591
	0.524858	0.403321	0.356013	0.320856	0.395021	0.423373	0.371131	0.378929	0.373712	0.882703
	0.586418	0.339151	0.408951	0.45376	0.417544	0.423373	0.323088	0.41466	0.408951	0.795536
