# Supplementary material for: Loss of centromere function drives karyotype evolution in closely related Malassezia species
Source: eLife journal article supplement (doi:10.7554/elife.53944), 2020-01-20
Supplement: supp [file elife-53944-supp-v1.zip › elife_poa_e53944_Figure_4_source_data_5.xlsx]

## Sheet: Sheet1
Relative abundance of Histone H3 over Histone H4 in M. slooffiae
analysis across CEN1
	L2	L1	Core	R1	Control
Experiment 1	0.721965	0.790041	0.41466	0.76313	0.790041
	0.888843	0.732043	0.392292	0.784584	0.737135
	0.840896	0.48971	0.356013	0.747425	0.716978
Experiment 2	0.737135	0.628507	0.080772	0.619854	0.737135
	0.773783	0.650671	0.0967228	0.702222	0.773783
	0.779165	0.668964	0.0960547	0.678302	0.779165
Experiment 3	0.747425	0.806642	0.381565	0.712025	0.823591
	0.852635	0.76313	0.403321	0.742262	0.882703
	0.784584	0.547147	0.339151	0.707107	0.795536
