# Supplementary material for: Loss of centromere function drives karyotype evolution in closely related Malassezia species
Source: eLife journal article supplement (doi:10.7554/elife.53944), 2020-01-20
Supplement: supp [file elife-53944-supp-v1.zip › elife_poa_e53944_Figure_4_source_data_6.xlsx]

## Sheet: Sheet1
Relative abundance of Histone H3 over Histone H4 in M. globosa
Analysis across CEN2
	L2	L1	Core	R1	R2	Control
Experiment 1	0.371131	0.378929	0.325335	0.432269	0.400535	0.615572
	0.406126	0.316439	0.334482	0.356013	0.429283	0.582367
	0.432269	0.316439	0.220676	0.336808	0.400535	0.806642
Experiment 2	0.376312	0.329877	0.246558	0.320856	0.473029	0.659754
	0.376312	0.29937	0.205898	0.363493	0.395021	0.846745
	0.358489	0.320856	0.248273	0.378929	0.420448	0.539614
Experiment 3	0.329877	0.303549	0.216134	0.366021	0.386891	0.619854
	0.384219	0.307786	0.271684	0.360982	0.45376	0.790041
	0.334482	0.348686	0.216134	0.371131	0.460094	0.510506
