# Supplementary material for: Loss of centromere function drives karyotype evolution in closely related Malassezia species
Source: eLife journal article supplement (doi:10.7554/elife.53944), 2020-01-20
Supplement: supp [file elife-53944-supp-v1.zip › elife_poa_e53944_Supplementary_file_1.docx]

**Loss of centromere function drives karyotype evolution in closely related *Malassezia* species**

Sundar Ram Sankaranarayanan1, Giuseppe Ianiri2,$, Marco A. Coelho2, Md. Hashim Reza1, Bhagya C. Thimmappa1,#, Promit Ganguly1, Rakesh Netha Vadnala3, Sheng Sun2, Rahul Siddharthan3, Christian Tellgren-Roth4, Thomas L Dawson Jr.5,6, Joseph Heitman2,*, and Kaustuv Sanyal1,*

**List of primers utilized in this study.**

| **Primers to generate epitope tagging alleles in *M. sympodialis*** | | |
| --- | --- | --- |
| Msy Mtw1 N-P1 | GCGCGCCTAGGCCTCTGCAGGTCGACTCTGACTGACCACGACGAGCTG | Primers to tag Mtw1 with GFP at N- terminus |
| Msy Mtw1 N-P2 | CGCCCTTGCTCACCATCGAGGGGTGGAGGTACAATAG |
| Msy Mtw1 N-P3 | CTATTGTACCTCCACCCCTCGATGGTGAGCAAGGGCG |
| Msy Mtw1 N-P4 | GCGTCCGAGGTGGACATGTACAGCTCGTCCATGCC |
| Msy Mtw1 N-P5 | GGCATGGACGAGCTGTAcATGTCCACCTCGGACGC |
| Msy Mtw1 N-P6 | GAGGATCTGCACCGTGGCACATTGCGCGATGATG |
| Msy Mtw1 N-P7 | CATCATCGCGCAATGTGCCACGGTGCAGATCCTC |
| Msy Mtw1 N-P8 | TGATTACGAATTCTTAATTAAGATATCGAGCGTCCTCTCCTATGTCTGACC |
| **Primers to generate epitope tagging alleles in *M. furfur*** | | |
| MfCse4 P1 | GCGCGCCTAGGCCTCTGCAGGTCGACTCTATGCAGCAACAGGCACACATG | Primers to tag CENP-A with 3xFLAG tag at C terminus |
| MfCse4 P2 | CTACTTGTCATCGTCATCCTTGTAGTCGATGTCATGATCTTTATAATCACCGTCATGGTCTTTGTAGTCCCGGATGTCGCCCCAATG |
| Mf NAT-F | GACTACAAAGACCATGACGGTGATTATAAAGATCATGACATCGACTACAAGGATGACGATGACAAGTAGTCCACGGTGCAGATCCTCG |
| Mf NAT-R | GCTTTCATAGGAACATGCCCTGCGTCCTCTCCTATGTCTG |
| MfCse4 P3 | CAGACATAGGAGAGGACGCAGGGCATGTTCCTATGAAAGC |
| MfCse4 P4 | TGATTACGAATTCTTAATTAAGATATCGAGGAGGCGATCAACCGGCTTAG |
| **Primers for *M. sympodialis* centromeres** | | |
| MS1 F1 | AAGAATTGATAACATTGTTGCAC | *MsyCEN1* primers |
| MS1 R1 | TAGAATAAAATGTCGCGAAGG |
| MS2 F1 | CTGAAGAAAAGAAACAAATTCG | *MsyCEN2* primers |
| MS2 R1 | TCGGAAATCCCGCAAAAG |
| MS3 F1 | CATATTCAGCCTCCACTAAG | *MsyCEN3* primers |
| MS3 R1 | CCTCTATCGAGTGCTCTAC |
| MS4 F1 | CGATATGGATTGGACTTATAAGTC | *MsyCEN4* primers |
| MS4 R1 | AAAAGCAATACGTAGACGG |
| MS5 F1 | AAATTACCGACCAGAATTG | *MsyCEN5* primers |
| MS5 R1 | ATCTGTGTCCGCTCTCATC |
| MS6 F1 | TTTGACGCTTTATTTGTGTTTC | *MsyCEN6* primers |
| MS6 R1 | CACATATGCACGAATAATAAAACG |
| MS7 F1 | GATACATATTCTTACACTAATACTATTCG | *MsyCEN7* primers |
| MS7 R1 | GCATAGAGCTAATATCTGATATTC |
| MS8 F1 | GGAAGCATGAGATATTGG | *MsyCEN8* primers |
| MS8 R1 | AAACAAAGTAAAATTCTAATCACG |
| MS8 LF1 | CTCCTCCGATACGATTCAC | *MsyCEN8* L1 primers |
| MS8 LR1 | CAGCCATTATCTCCGACAC |
| MS8 LF2 | CTGGGTAGATTGAGAATGAG | *MsyCEN8* L2 primers |
| MS8 LR2 | CATGTATGTTCAGTCCCATG |
| MS8 RF1 | ATGATCCAAAAGAAAGCATAC | *MsyCEN8* R1 primers |
| MS8 RR1 | GAAGTATGTCTGGGTGAAGC |
| MS C3 | GAAGACGACAACGATACC | Control primers away from *MsyCEN1* |
| MS C4 | TAGCGAGTGAATAGCGTC |
| **Primers for chromoblot analysis in *M. globosa*** | | |
| Maglo_CBS7966_v2_Chr3_216001_216700_Forward: | GATGAGCGACGGAAACAAGC | Probe for Chr3 |
| Maglo_CBS7966_v2_Chr3_216001_216700_Reverse: | AACTTCGTCCCATTCGCCTT |
| Maglo_CBS7966_v2_Chr4_150001_150700_Forward: | CATCGAGATTGCAACACAGC | Probe for Chr4 |
| Maglo_CBS7966_v2_Chr4_150001_150700_Reverse: | TGAACACAGGCGCCATTGTA |
| Maglo_CBS7966_v2_Chr5_213001_213600_Forward: | TGCAATGAAGTCCGGCATGA | Probe for Chr5 |
| Maglo_CBS7966_v2_Chr5_213001_213600_Reverse: | AGGCACACGTTCATCTGGTT |
| Maglo_CBS7966_v2_Chr6_461001_461600_Forward: | TGCTCACCCAAAAGACGACC | Probe for Chr6 |
| Maglo_CBS7966_v2_Chr6_461001_461600_Reverse: | CGCGGACCTGGAACTGTATT |
| **Primers for *M. globosa* centromeres** | | |
| Mg 1F | GAATTGCAATAGTAAGCCGAAC | *MgCEN1* |
| Mg 1R | GAATTATTCAACCCTTTGTACATC |
| Mg 2F | GCAAAAGTTCTGGTTAAAC | *MgCEN2* |
| Mg 2R | TTCGTTAAATTACTGTCATTAG |
| Mg 3F | GCATGTACAATTCTCTAAAAC | *MgCEN3* |
| Mg 3R | CAAGTTATCTTAATCCGCAAG |
| Mg 4F | CAGAAAATAATAGTGATTGATAC | *MgCEN4* |
| Mg 4R | ATTTAAGATACATACACAATGC |
| Mg 6F | GGAAATCCTGCGAGAATC | *MgCEN6* |
| Mg 6R | GCTGAATTCATAGAATCATTGAG |
| Mg 7F | GATGATCCCAGTAACAACTG | *MgCEN7* |
| Mg 7R | GGTAGAATTGAATTTGTGTTTATC |
| Mg 8F | GACTAGCGAATAAATCAATTGAC | *MgCEN8* |
| Mg 8R | TTAACCGTACCGAAAAACC |
| Mg 9F | GAAAATAGTGACTGGTGGAC | *MgCEN9* |
| Mg 9R | GATTCTATTGCTATATTGTGCTTC |
| Mg 5F | CTAAAAATGAAATTTGGGATAAAAC | *MgCEN5* |
| Mg 5R | AAGCACGATAAAAATCATAGC |
| Mg2 L2F | CGTACCTTGTCCAAGAGC | *MgCEN2* L2 primer pair |
| Mg2 L2R | AGATCCATAGGCTTTGAATGC |
| Mg2 L1F | ACCTTCGATTCTGTGACAC | *MgCEN2* L1 primer pair |
| Mg2 L1R | TGTTACACACTTTGCTTCGG |
| Mg2 R1F | AGGTCCTGACGATGTAATTG | *MgCEN2* R1 primer pair |
| Mg2 R1R | GTTGTTGATGTATGTCGTTCATG |
| Mg2 R2F | AGCTATGCGATGTTGTTCTG | *MgCEN2* R2 primer pair |
| Mg2 R2R | CAGACGAGGAACTATTGTGAG |
| Mg C5 | GCATAACATACGAGGATGTGC | Primer for control locus |
| Mg C6 | ATAGTGCCTGAATCTGCTG |
| **Primers for *M. slooffiae* centromeres** | | |
| Slo1 FP | CAAATGAGCACAAACGTTG | *MslCEN1* |
| Slo1 RP | GGTAATTTACATTTCTTGTG |
| Slo2 FP | ACTCAATAATCCAATAGAACC | *MslCEN2* |
| Slo2 RP | GAGAAAACATAAATGGTAGG |
| Slo3 FP | AAACCGATTATCAATTCTCAAATG | *MslCEN3* |
| Slo3 RP | GTATCTGATTTGAAAACCTTCG |
| Slo4 FP | TTCACGTGTAGCTACTTG | *MslCEN4* |
| Slo4 RP | AAATACAACAAACAACTAAAACG |
| Slo5 FP | GAGCTGTGCAAGGTTAG | *MslCEN5* |
| Slo5 RP | GCCAAACAACGATGACG |
| Slo6 FP | AATAGATTTGACAACCTTTGC | *MslCEN6* |
| Slo6 RP | TGCACAATTGTAAGAAAGC |
| Slo7 FP | AATGCCAGATGATAAACTAGCTG | *MslCEN7* |
| Slo7 RP | GACTTCTGGCATAACTATTGG |
| Slo8 FP | TTATGCTATTGTTTGAATCCG | *MslCEN8* |
| Slo8 RP | CTATCATTAAACGGAGAATACTC |
| Slo9 FP | GACCTAGCTGTGCTTTTAG | *MslCEN9* |
| Slo9 RP | TTTCAGCAGCTTATTAGGC |
| Slo C1 | ACGACAAGCGTGTAAGG | Primers for control locus |
| Slo C2 | CCAACTTCTTCCTGCAG |
| Slo1 L2F | GGAACGTGACGAGATCAC | *MslCEN1* L2 primers |
| Slo1 L2R | GTGTAGATCCGAAGTCATCAC |
| Slo1 L1F | ATCTCTGCAAGCTTCGG | *MslCEN1* L1 primers |
| Slo1 L1R | AGTGGATGCTTCATCTTCTG |
| Slo1 R1F | CGAATGACTTCCTCAATGC | *MslCEN1* R1 primers |
| Slo1 R1R | TGCAACAGCAGAAGAGTC |
| Slo1 R2F | ATGCCGACCACAATCC | *MslCEN1* R2 primers |
| Slo1 R2R | ACTGTGCCTGTTTCGC |
| **Primers for *M. furfur* centromeres** | | |
| MF1 F1 | GATAGCAAACATGATTAAAGTAATAAC | *MfCEN1* |
| MF1 R1 | GACCAAAATAATATATATTAACAAATG |
| MF2 F1 | CAAAAGTGAAGAAGCAGG | *MfCEN2* |
| MF2 R1 | CACATATAAGAAGTAGAAAAGAAAACTC |
| MF3 F1 | CATGTCTGGACCTCGG | *MfCEN3* |
| MF3 R1 | CGTGGTGAGAACACAAC |
| MF4 F1 | CCTAAACTTATGAACTGTTTATTC | *MfCEN4* |
| MF4 R1 | GTTAAGTATTCCATAATGCTC |
| MF5 F1 | CTTCTGCCATCGTTTCTC | *MfCEN5* |
| MF5 R1 | CTTGATTGTTCCTTCGTAATTAAC |
| MF6 F2 | CATGTATGTTAAACGTCATAGTAC | *MfCEN6* |
| MF6 R2 | CGATTTGATCTATAATAACATAC |
| MF7 F1 | GTGAAGCTATAATATTATAGAATGAG | *MfCEN7* |
| MF7 R1 | CGTTTGAATCATTATAATACTG |
| MF7 LF1 | GAAAGCTTCATTCGGAGC | *MfCEN7* L1 primer pair |
| MF7 LR1 | CGTCTTGGGAAGAGCAG |
| MF7 LF2 | GGCGGATCATCTTTTCG | *MfCEN7* L2 primer pair |
| MF7 LR2 | GATTCTGATCGTCGGAGG |
| MF7 RF1 | GTGGCACTACTGGATCG | *MfCEN7* R1 primer pair |
| MF7 RR1 | CGTGTACCGGTACATGTG |
| MF7 RF2 | CTGTACCGCTACCTGC | *MfCEN7* R2 primer pair |
| MF7 RR2 | GTACGAATCGAGATCAACTG |
| GI154 | GTCGGAGAAGCAGTCAATGC | Primers for control locus |
| NAT sFP | GTGCGGAGAAGGCATTGTTC |
