# Supplementary figures and images for: Loss of centromere function drives karyotype evolution in closely related Malassezia species
Source: eLife journal article supplement (doi:10.7554/elife.53944), 2020-01-20

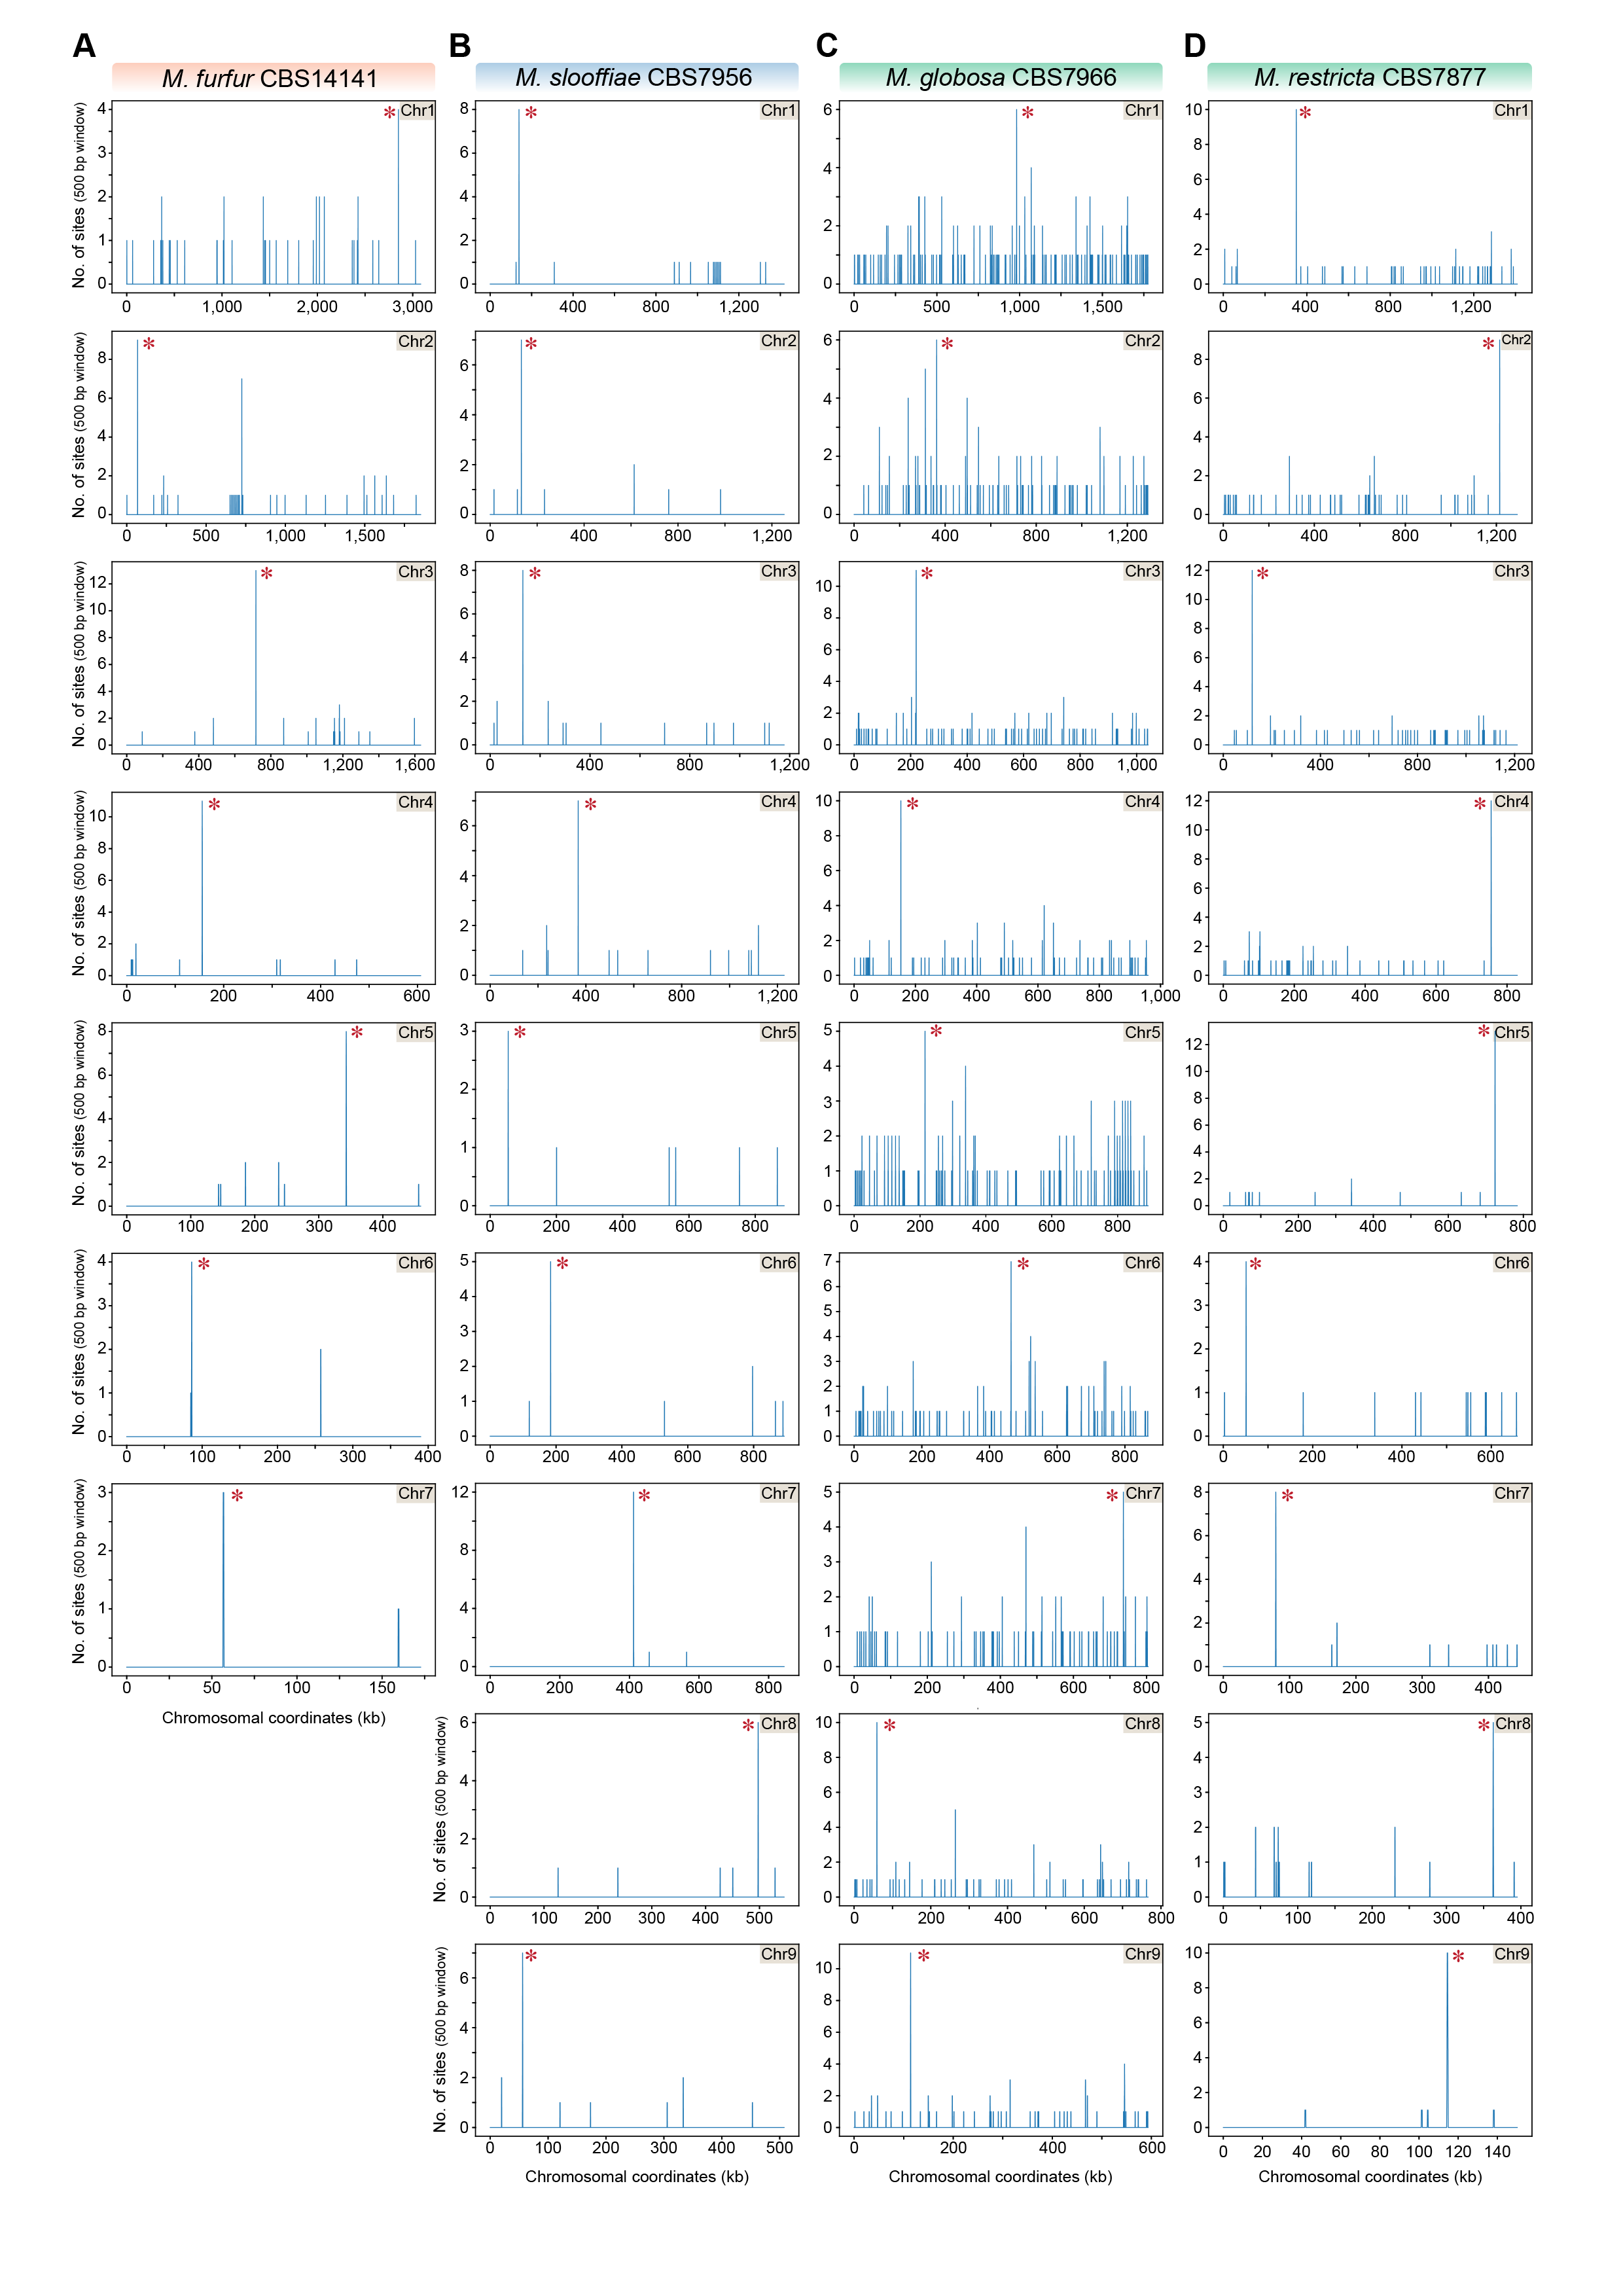

Supplement: supp [file elife-53944-supp-v1.zip › elife_poa_e53944_Figure_4_figure_supplement_2.tif]

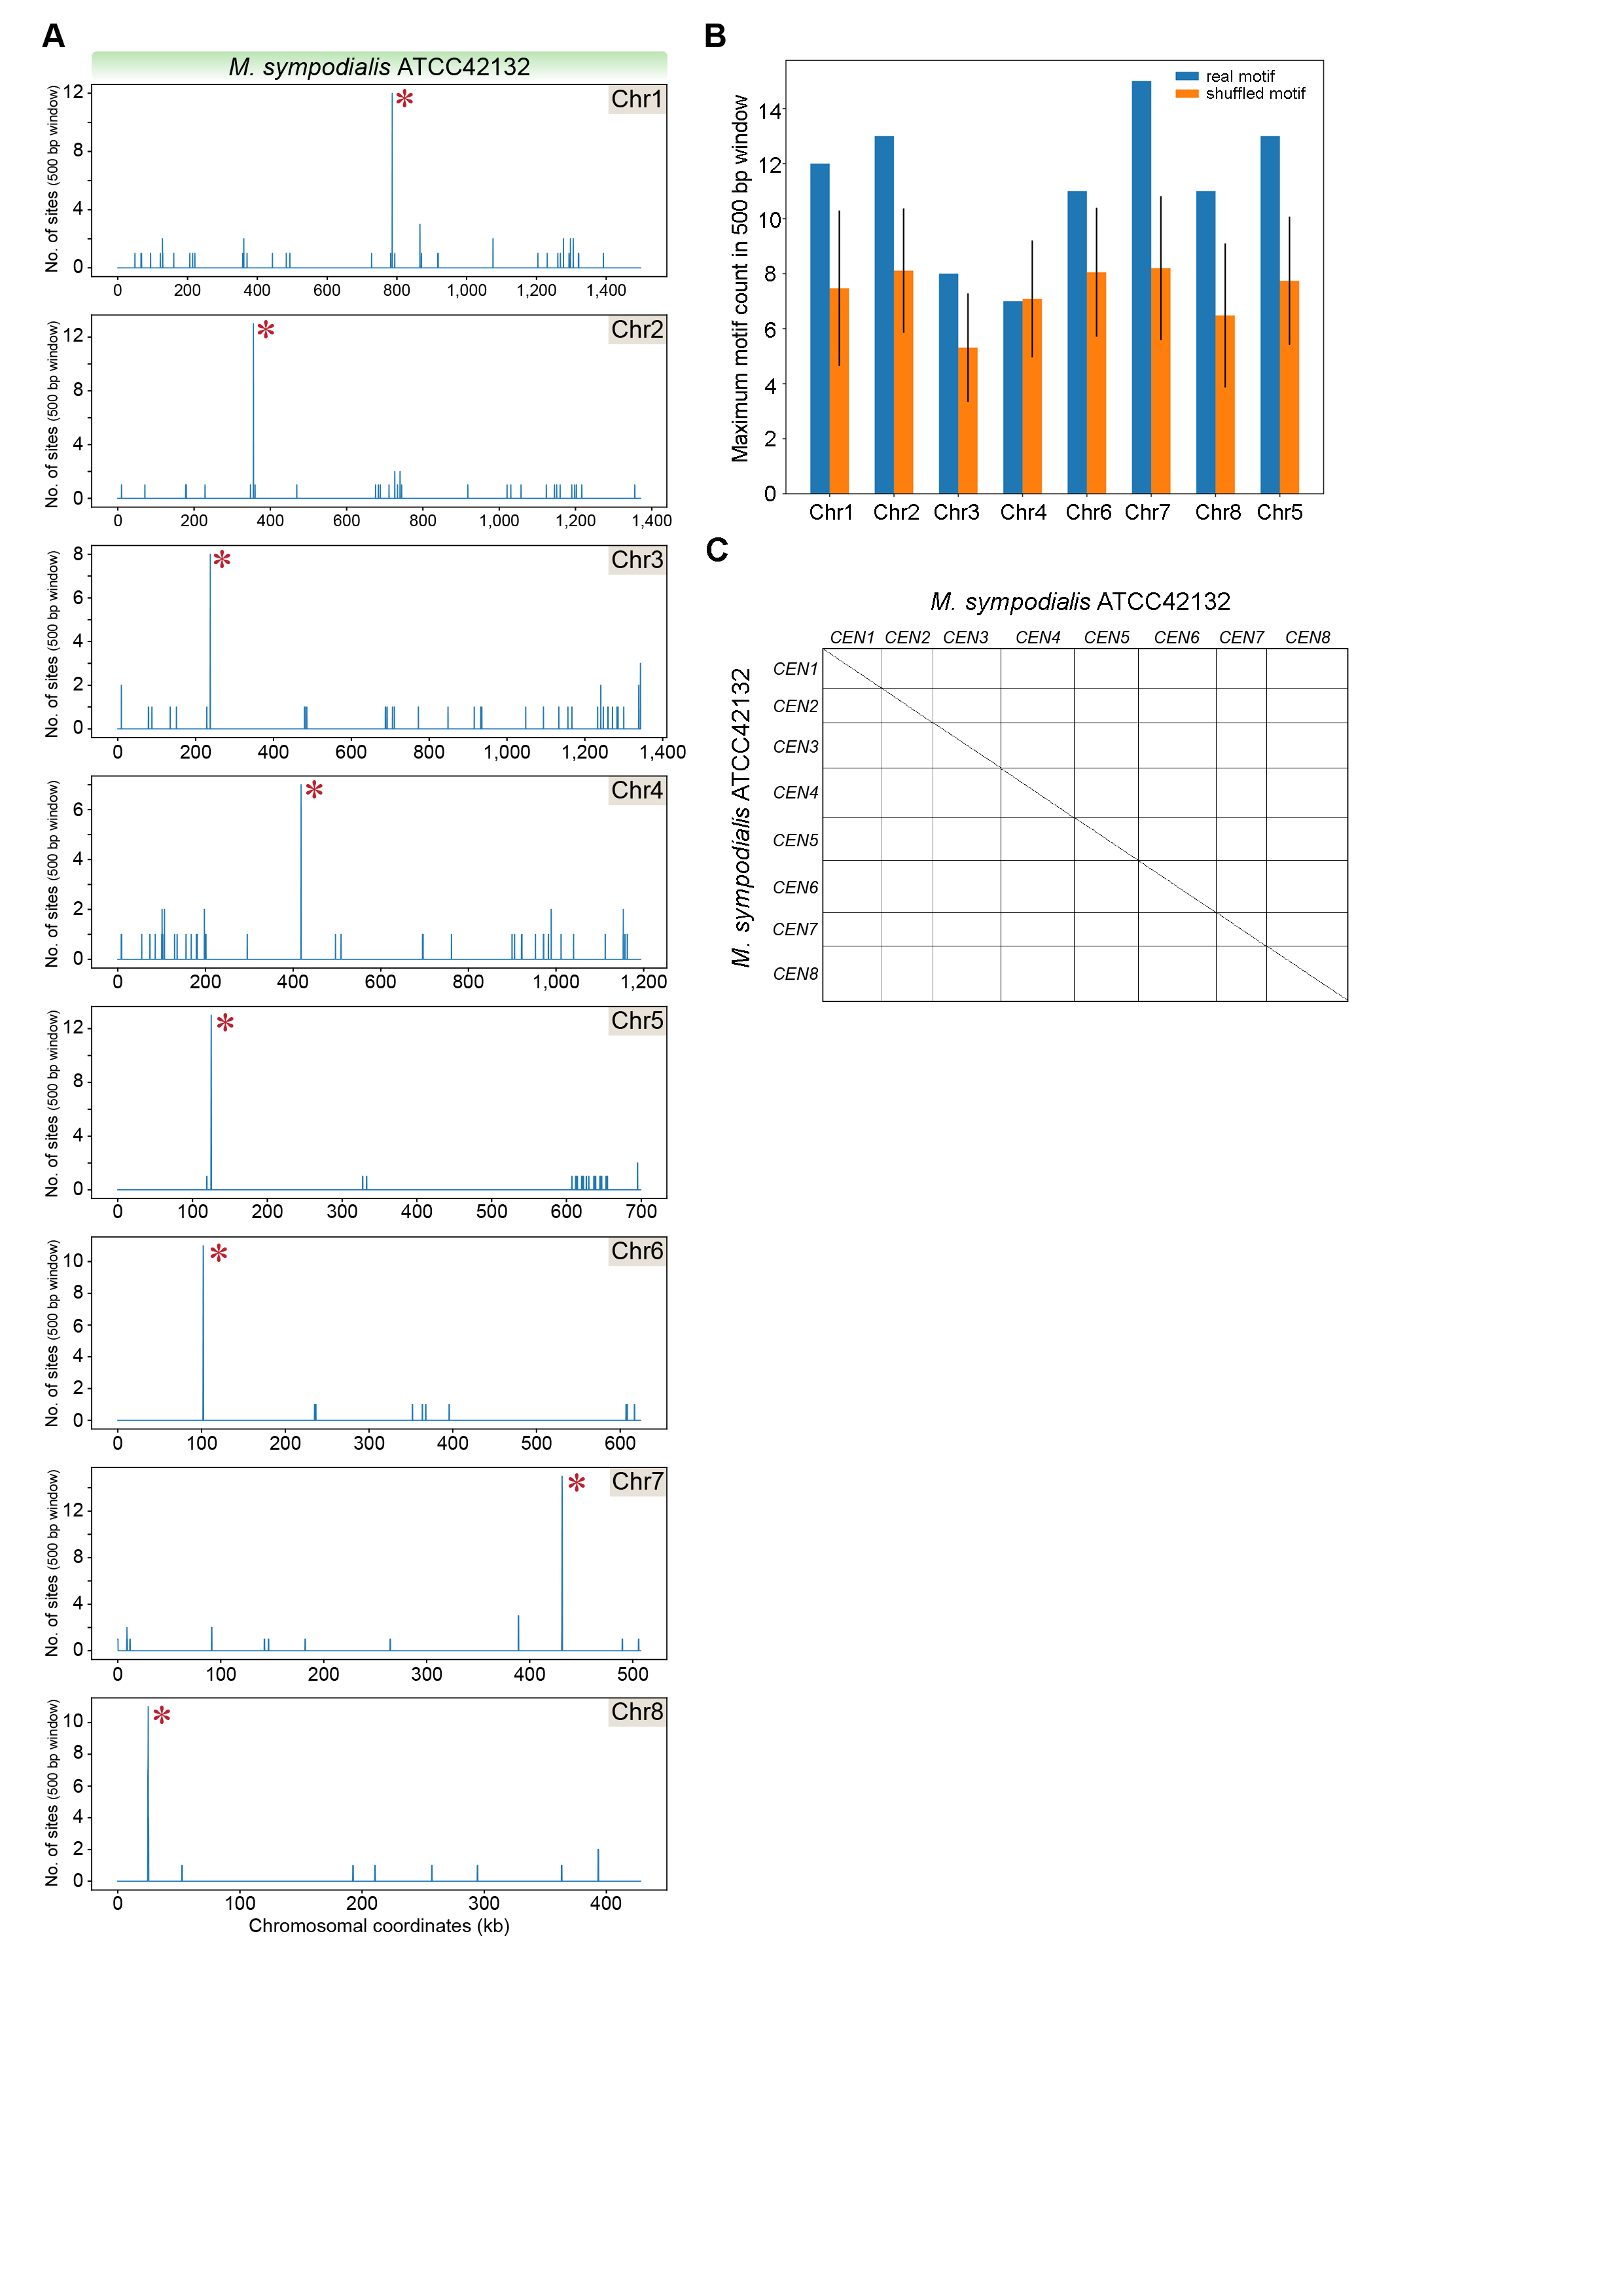

Supplement: supp [file elife-53944-supp-v1.zip › elife_poa_e53944_Figure_3_figure_supplement_2.tif]

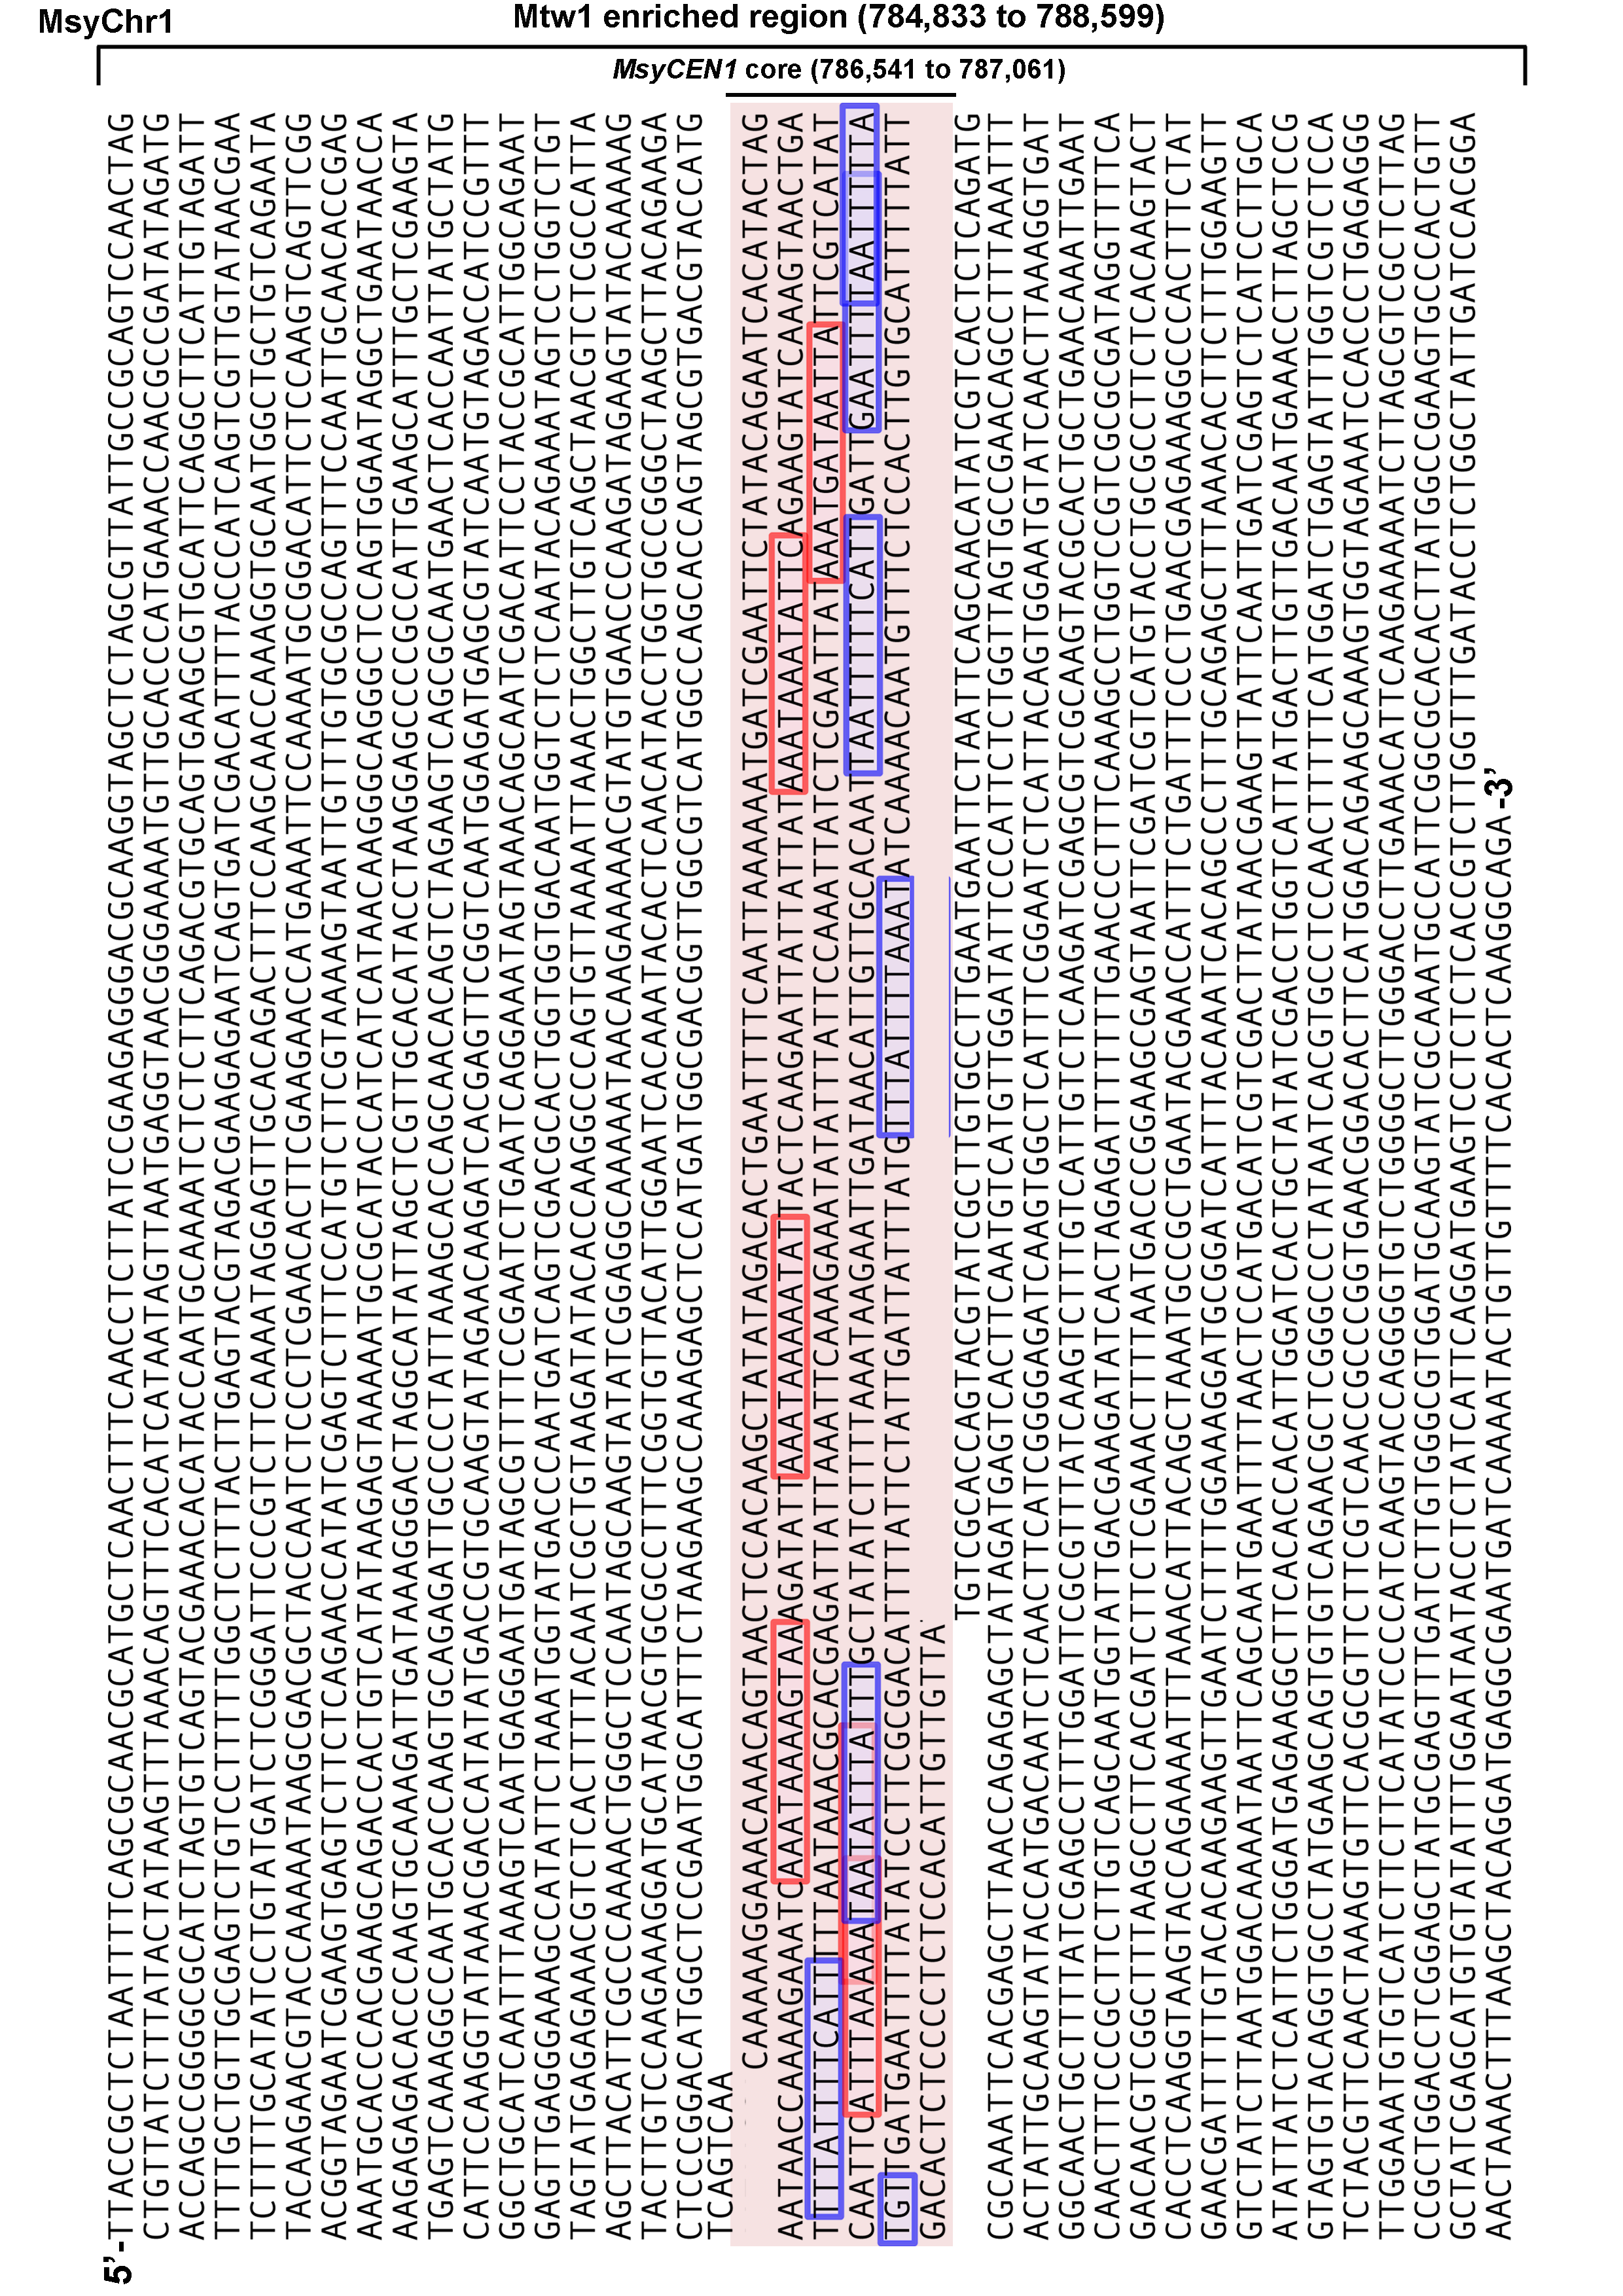

Supplement: supp [file elife-53944-supp-v1.zip › elife_poa_e53944_Figure_3_figure_supplement_3.tif]

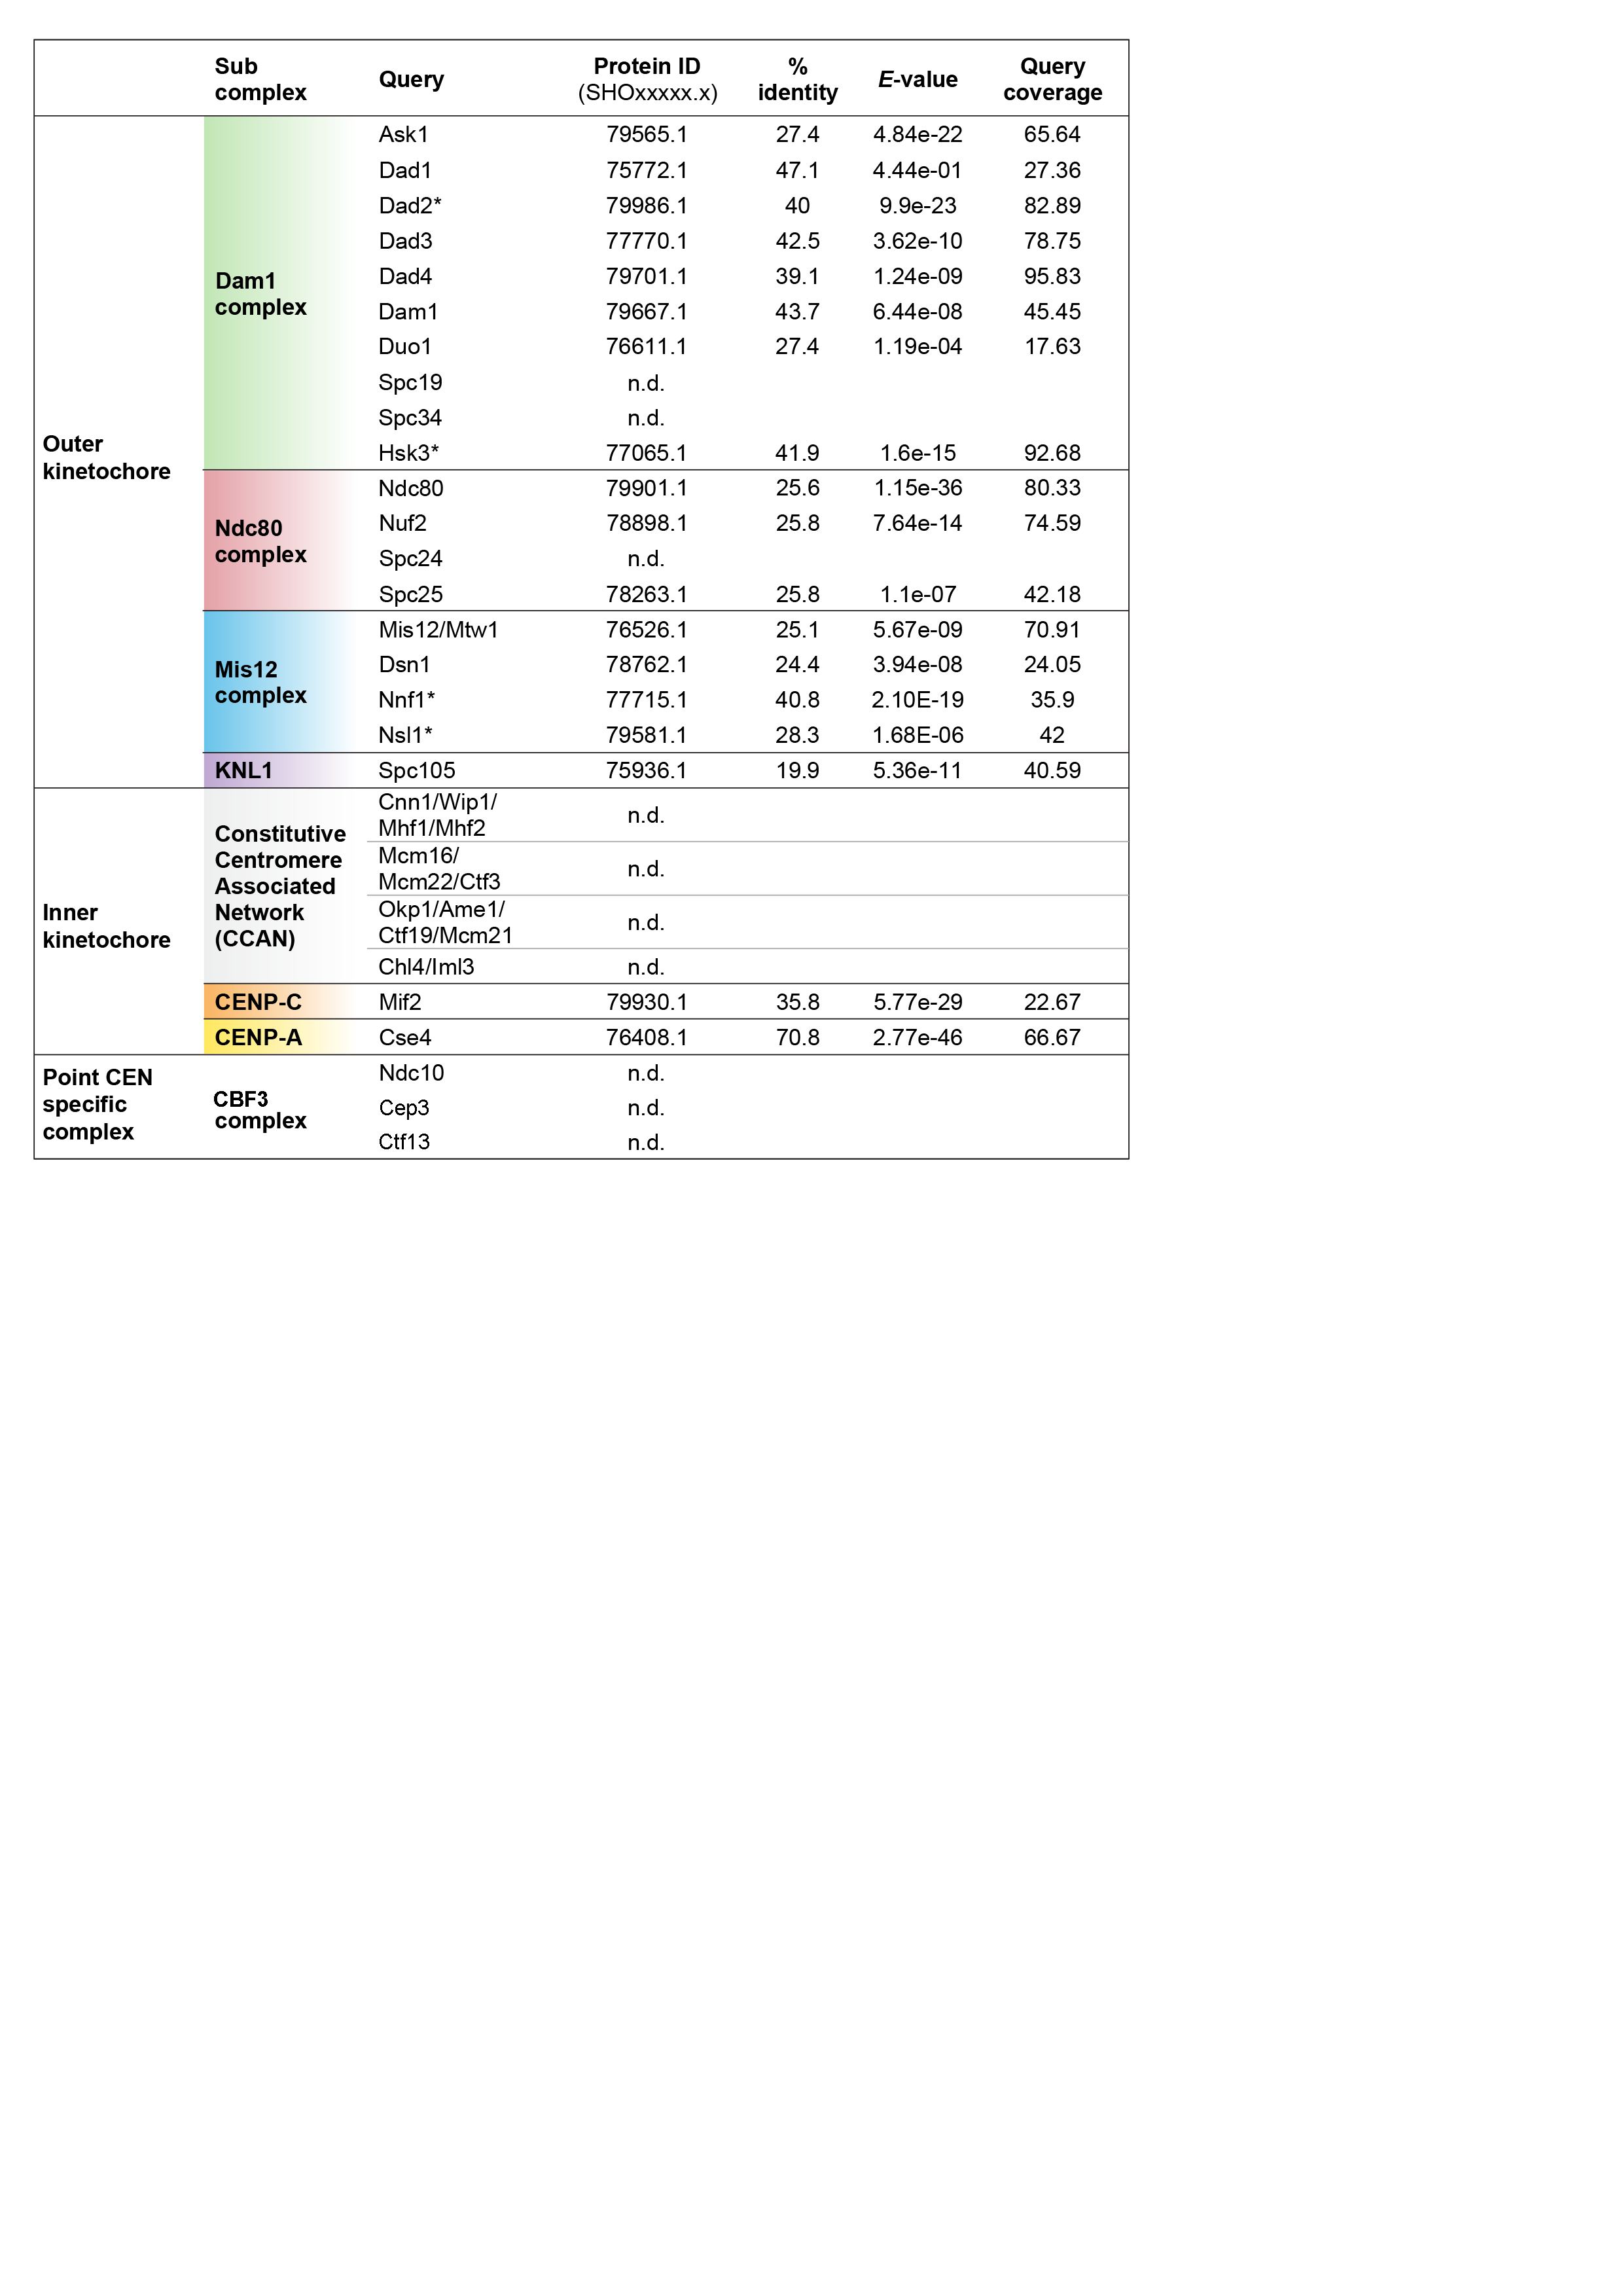

Supplement: supp [file elife-53944-supp-v1.zip › elife_poa_e53944_Figure_2_figure_supplement_1.tif]

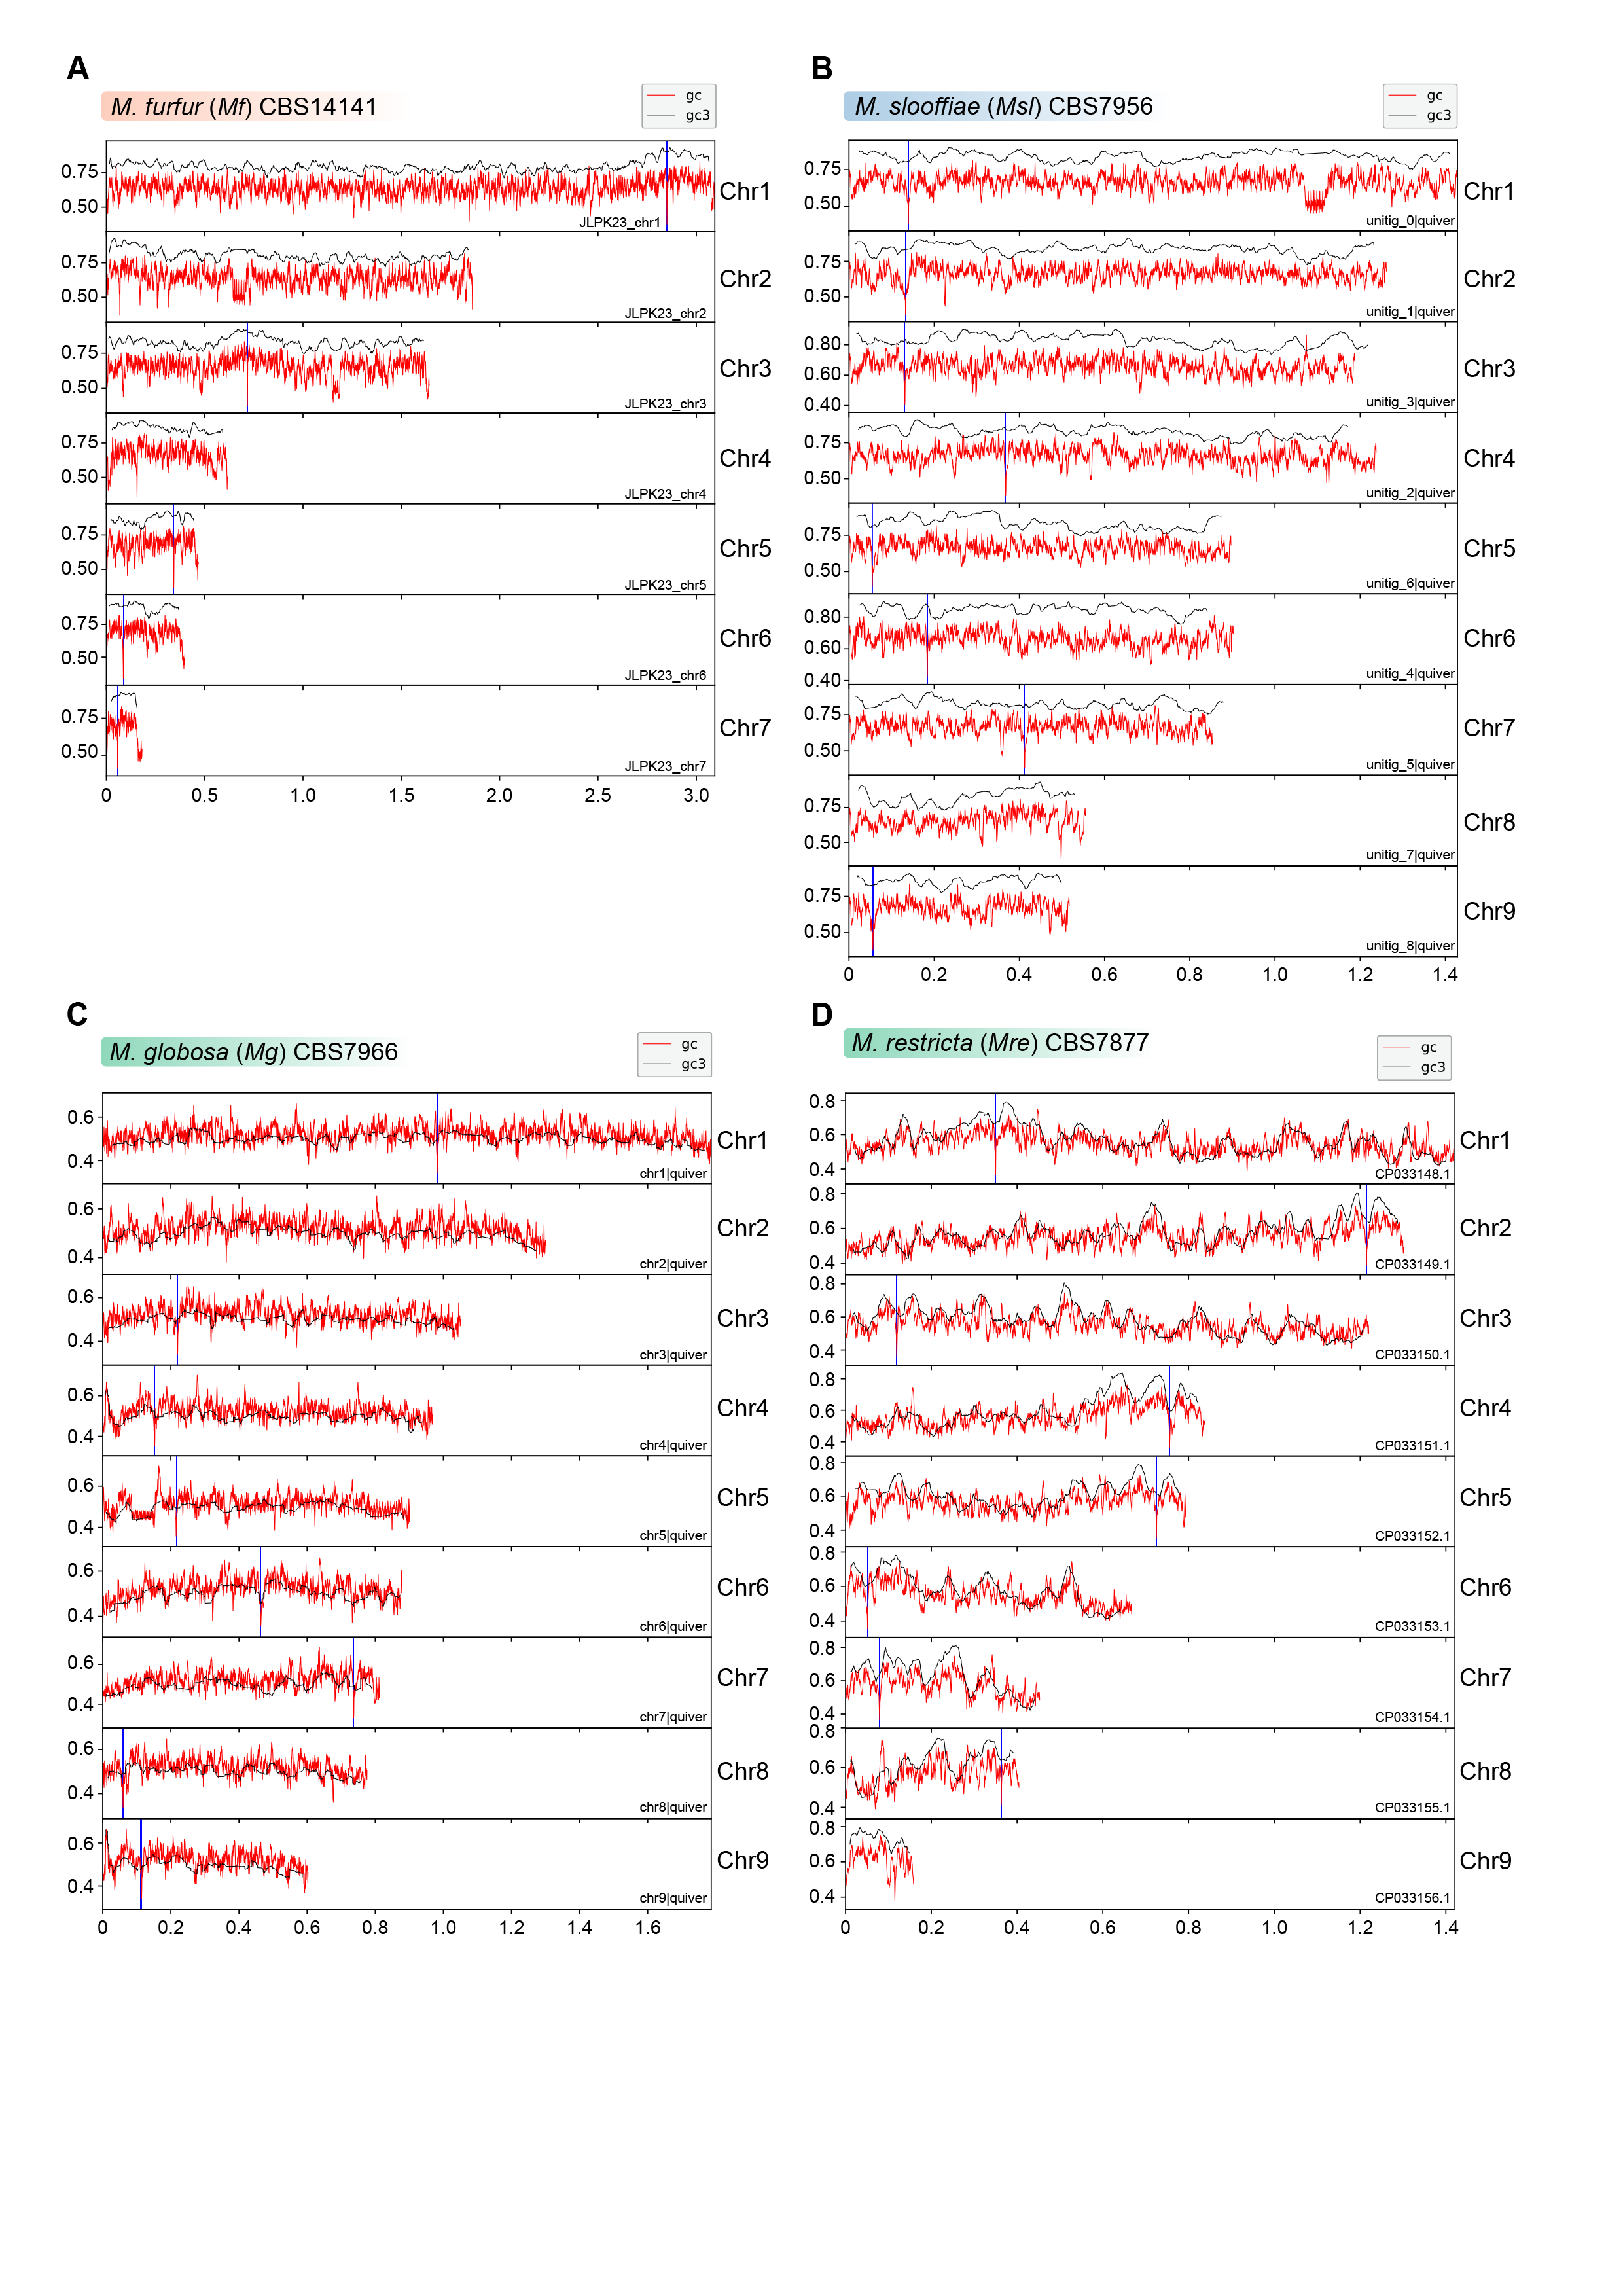

Supplement: supp [file elife-53944-supp-v1.zip › elife_poa_e53944_Figure_4_figure_supplement_1.tif]

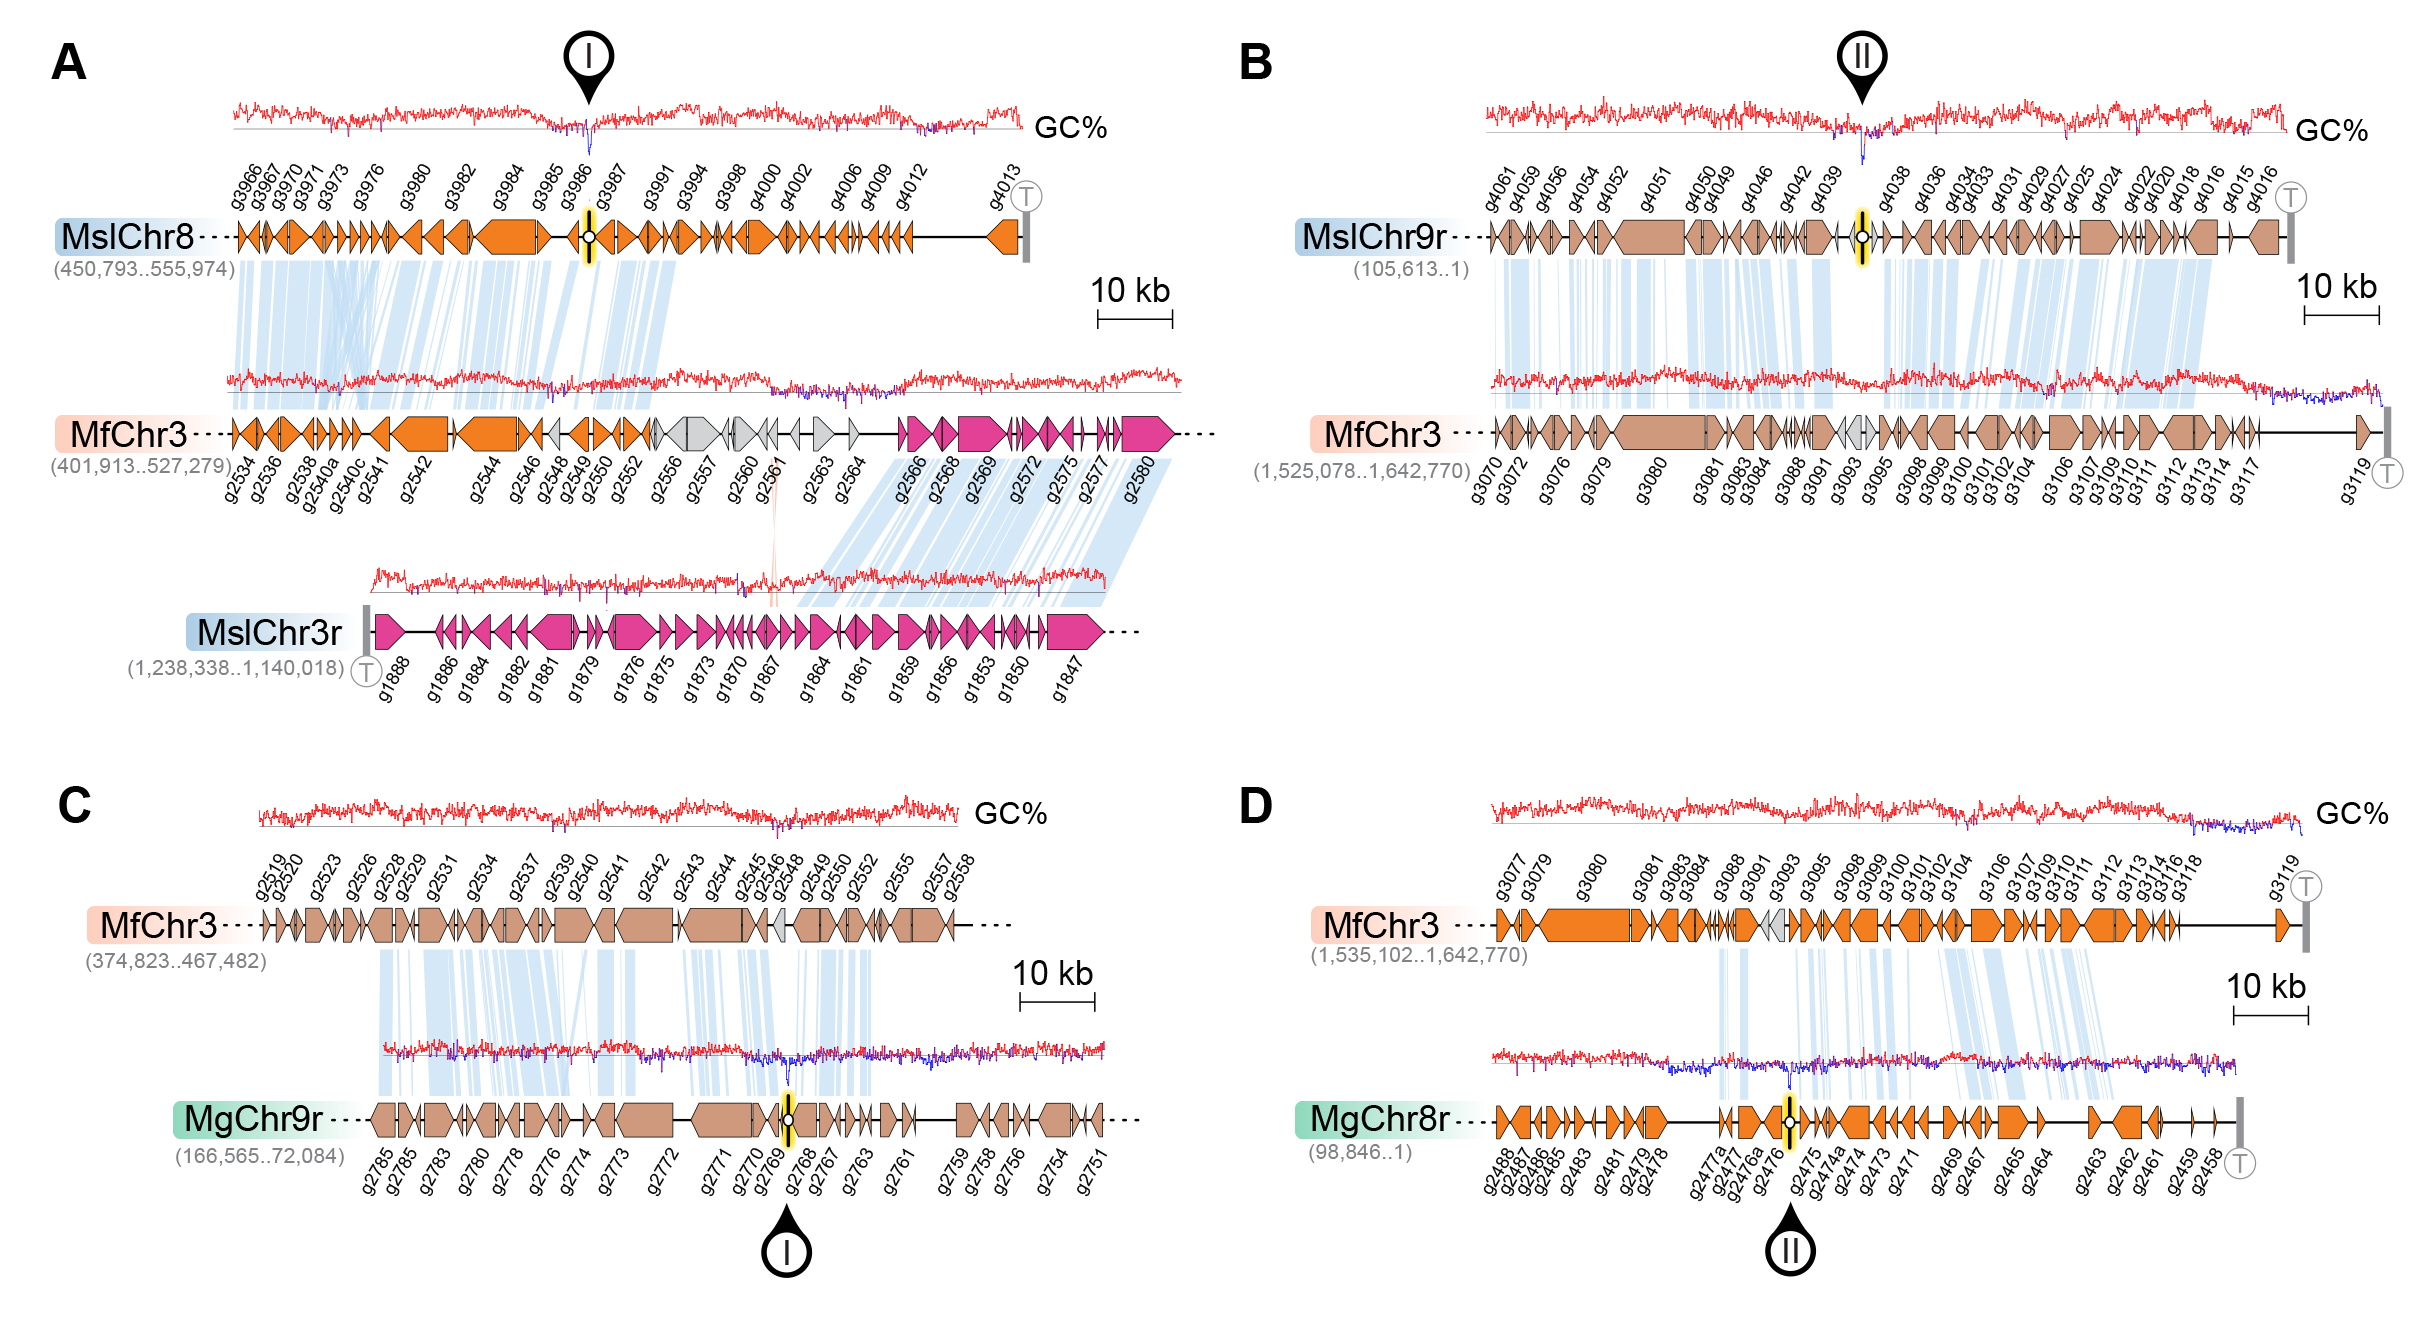

Supplement: supp [file elife-53944-supp-v1.zip › elife_poa_e53944_Figure_6_figure_supplement_1.tif]

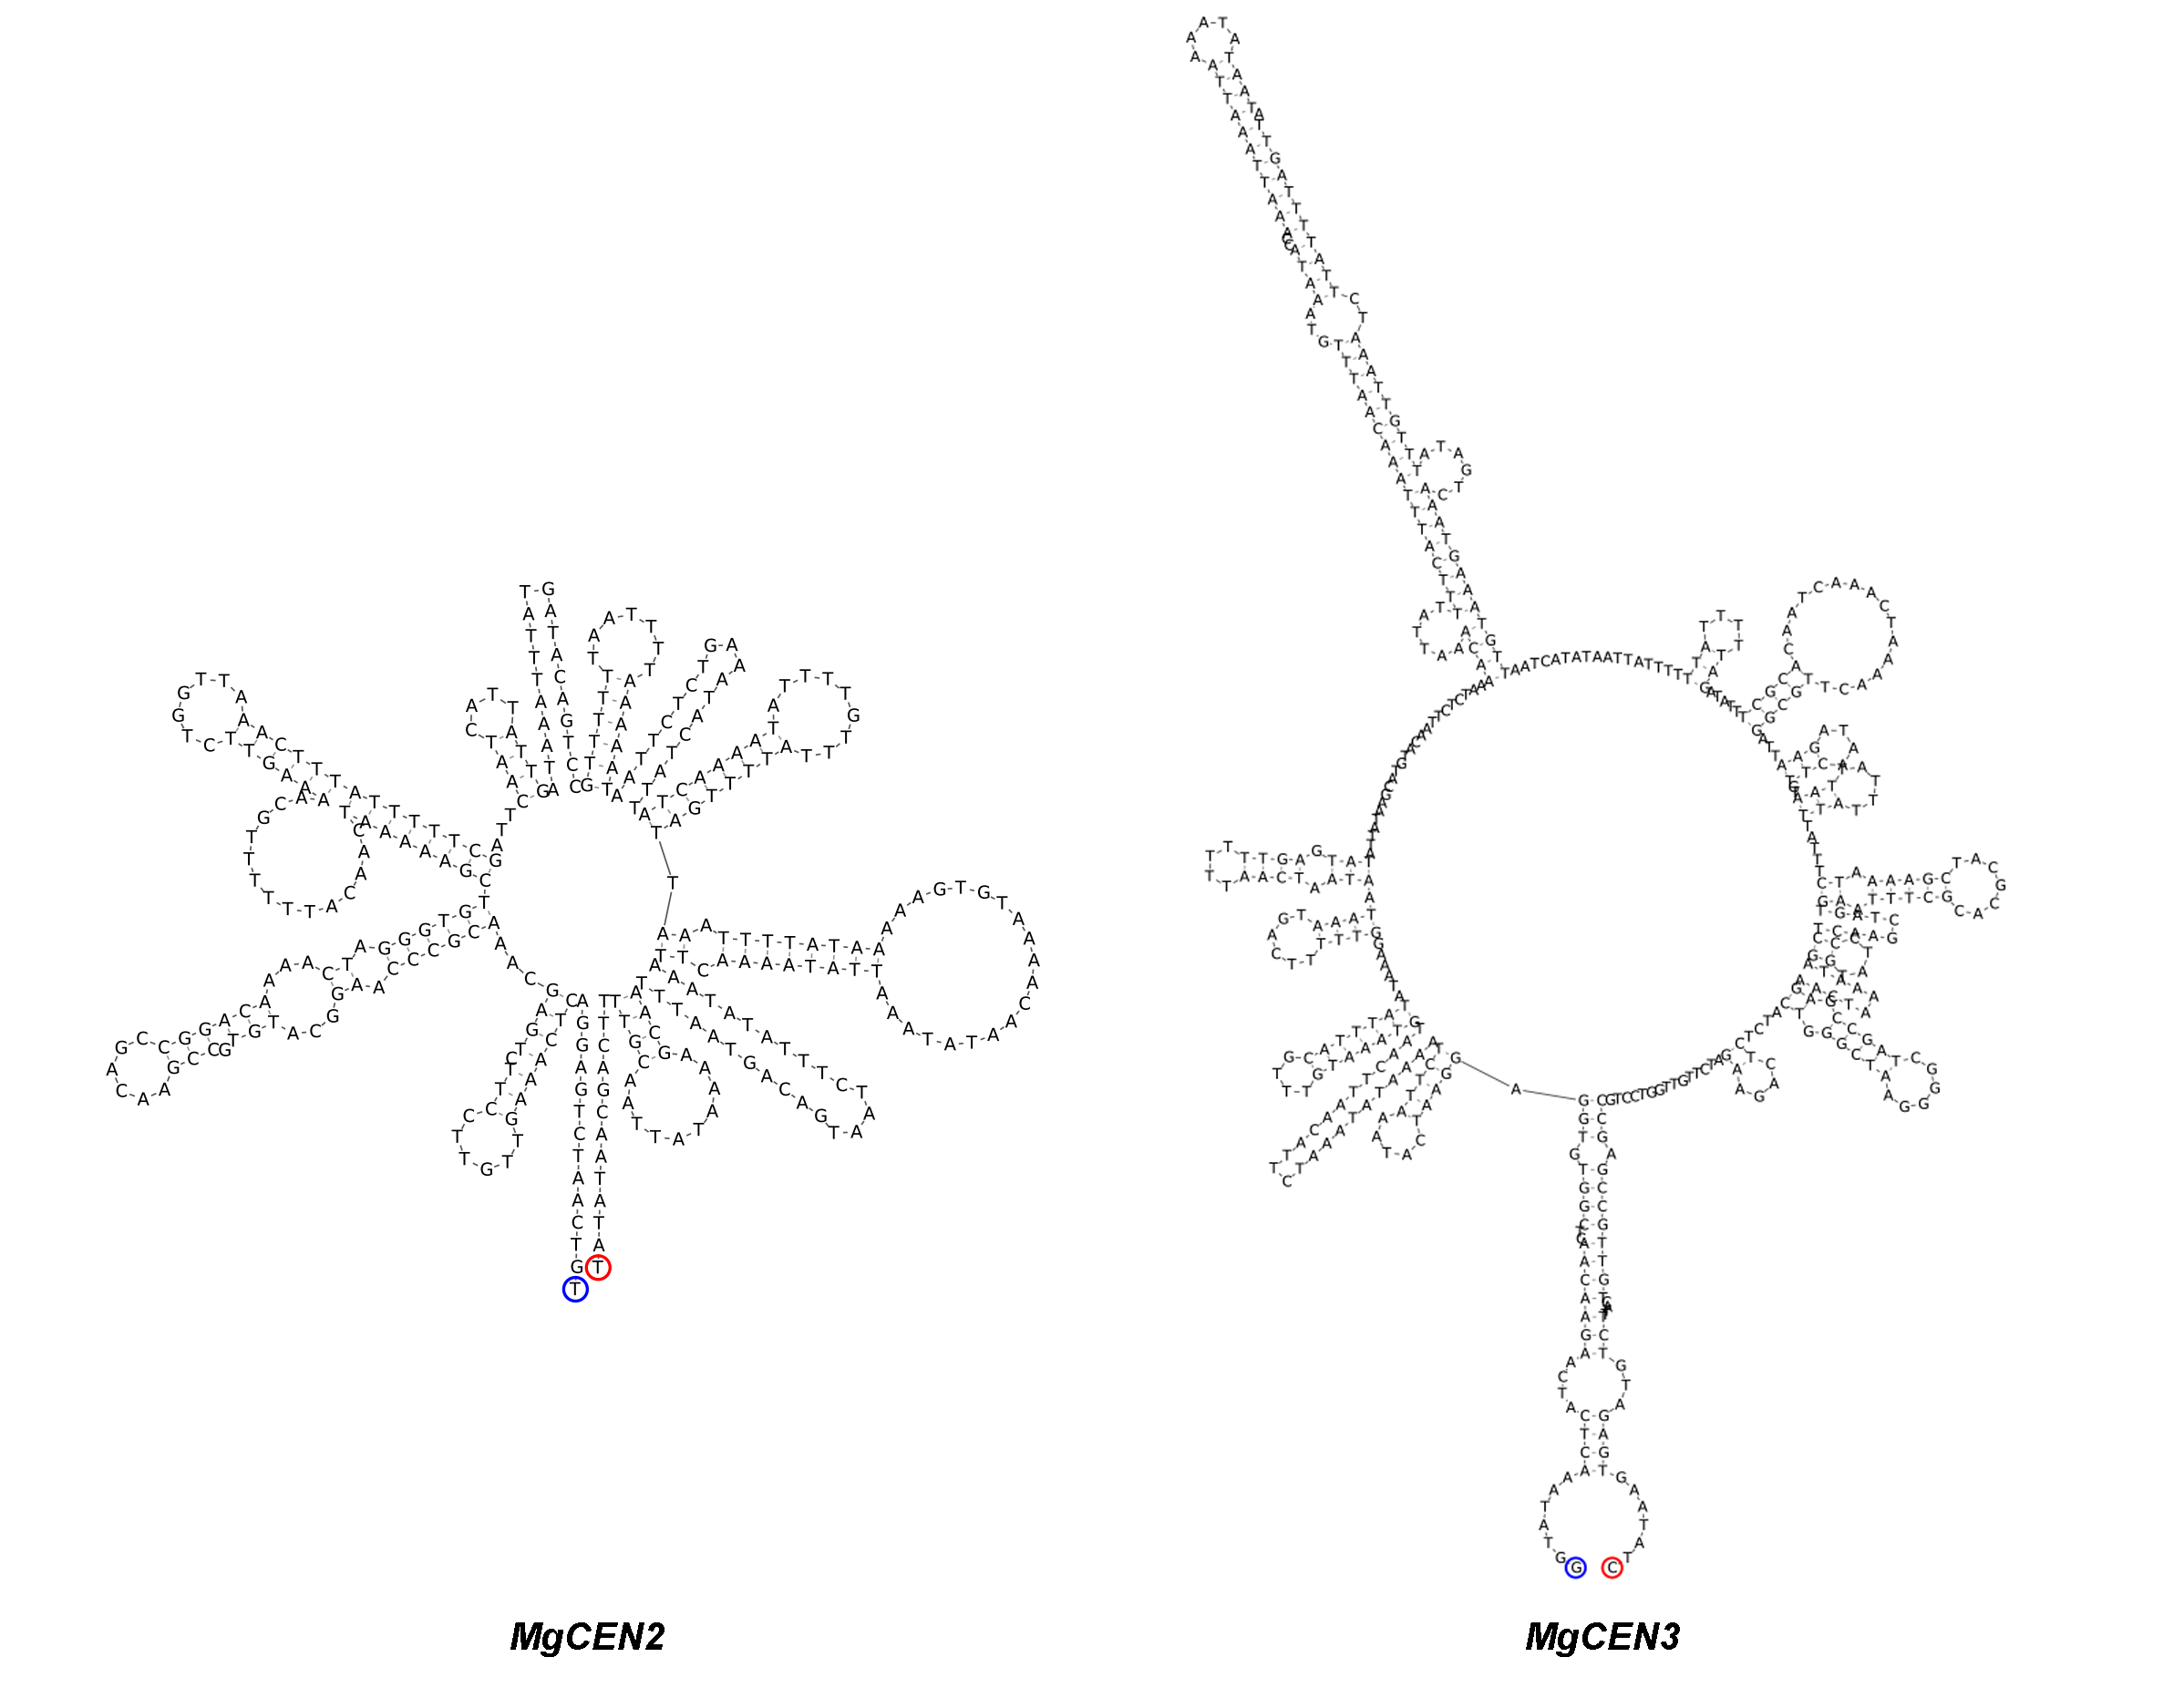

Supplement: supp [file elife-53944-supp-v1.zip › elife_poa_e53944_Figure_7_figure_supplement_4.tif]

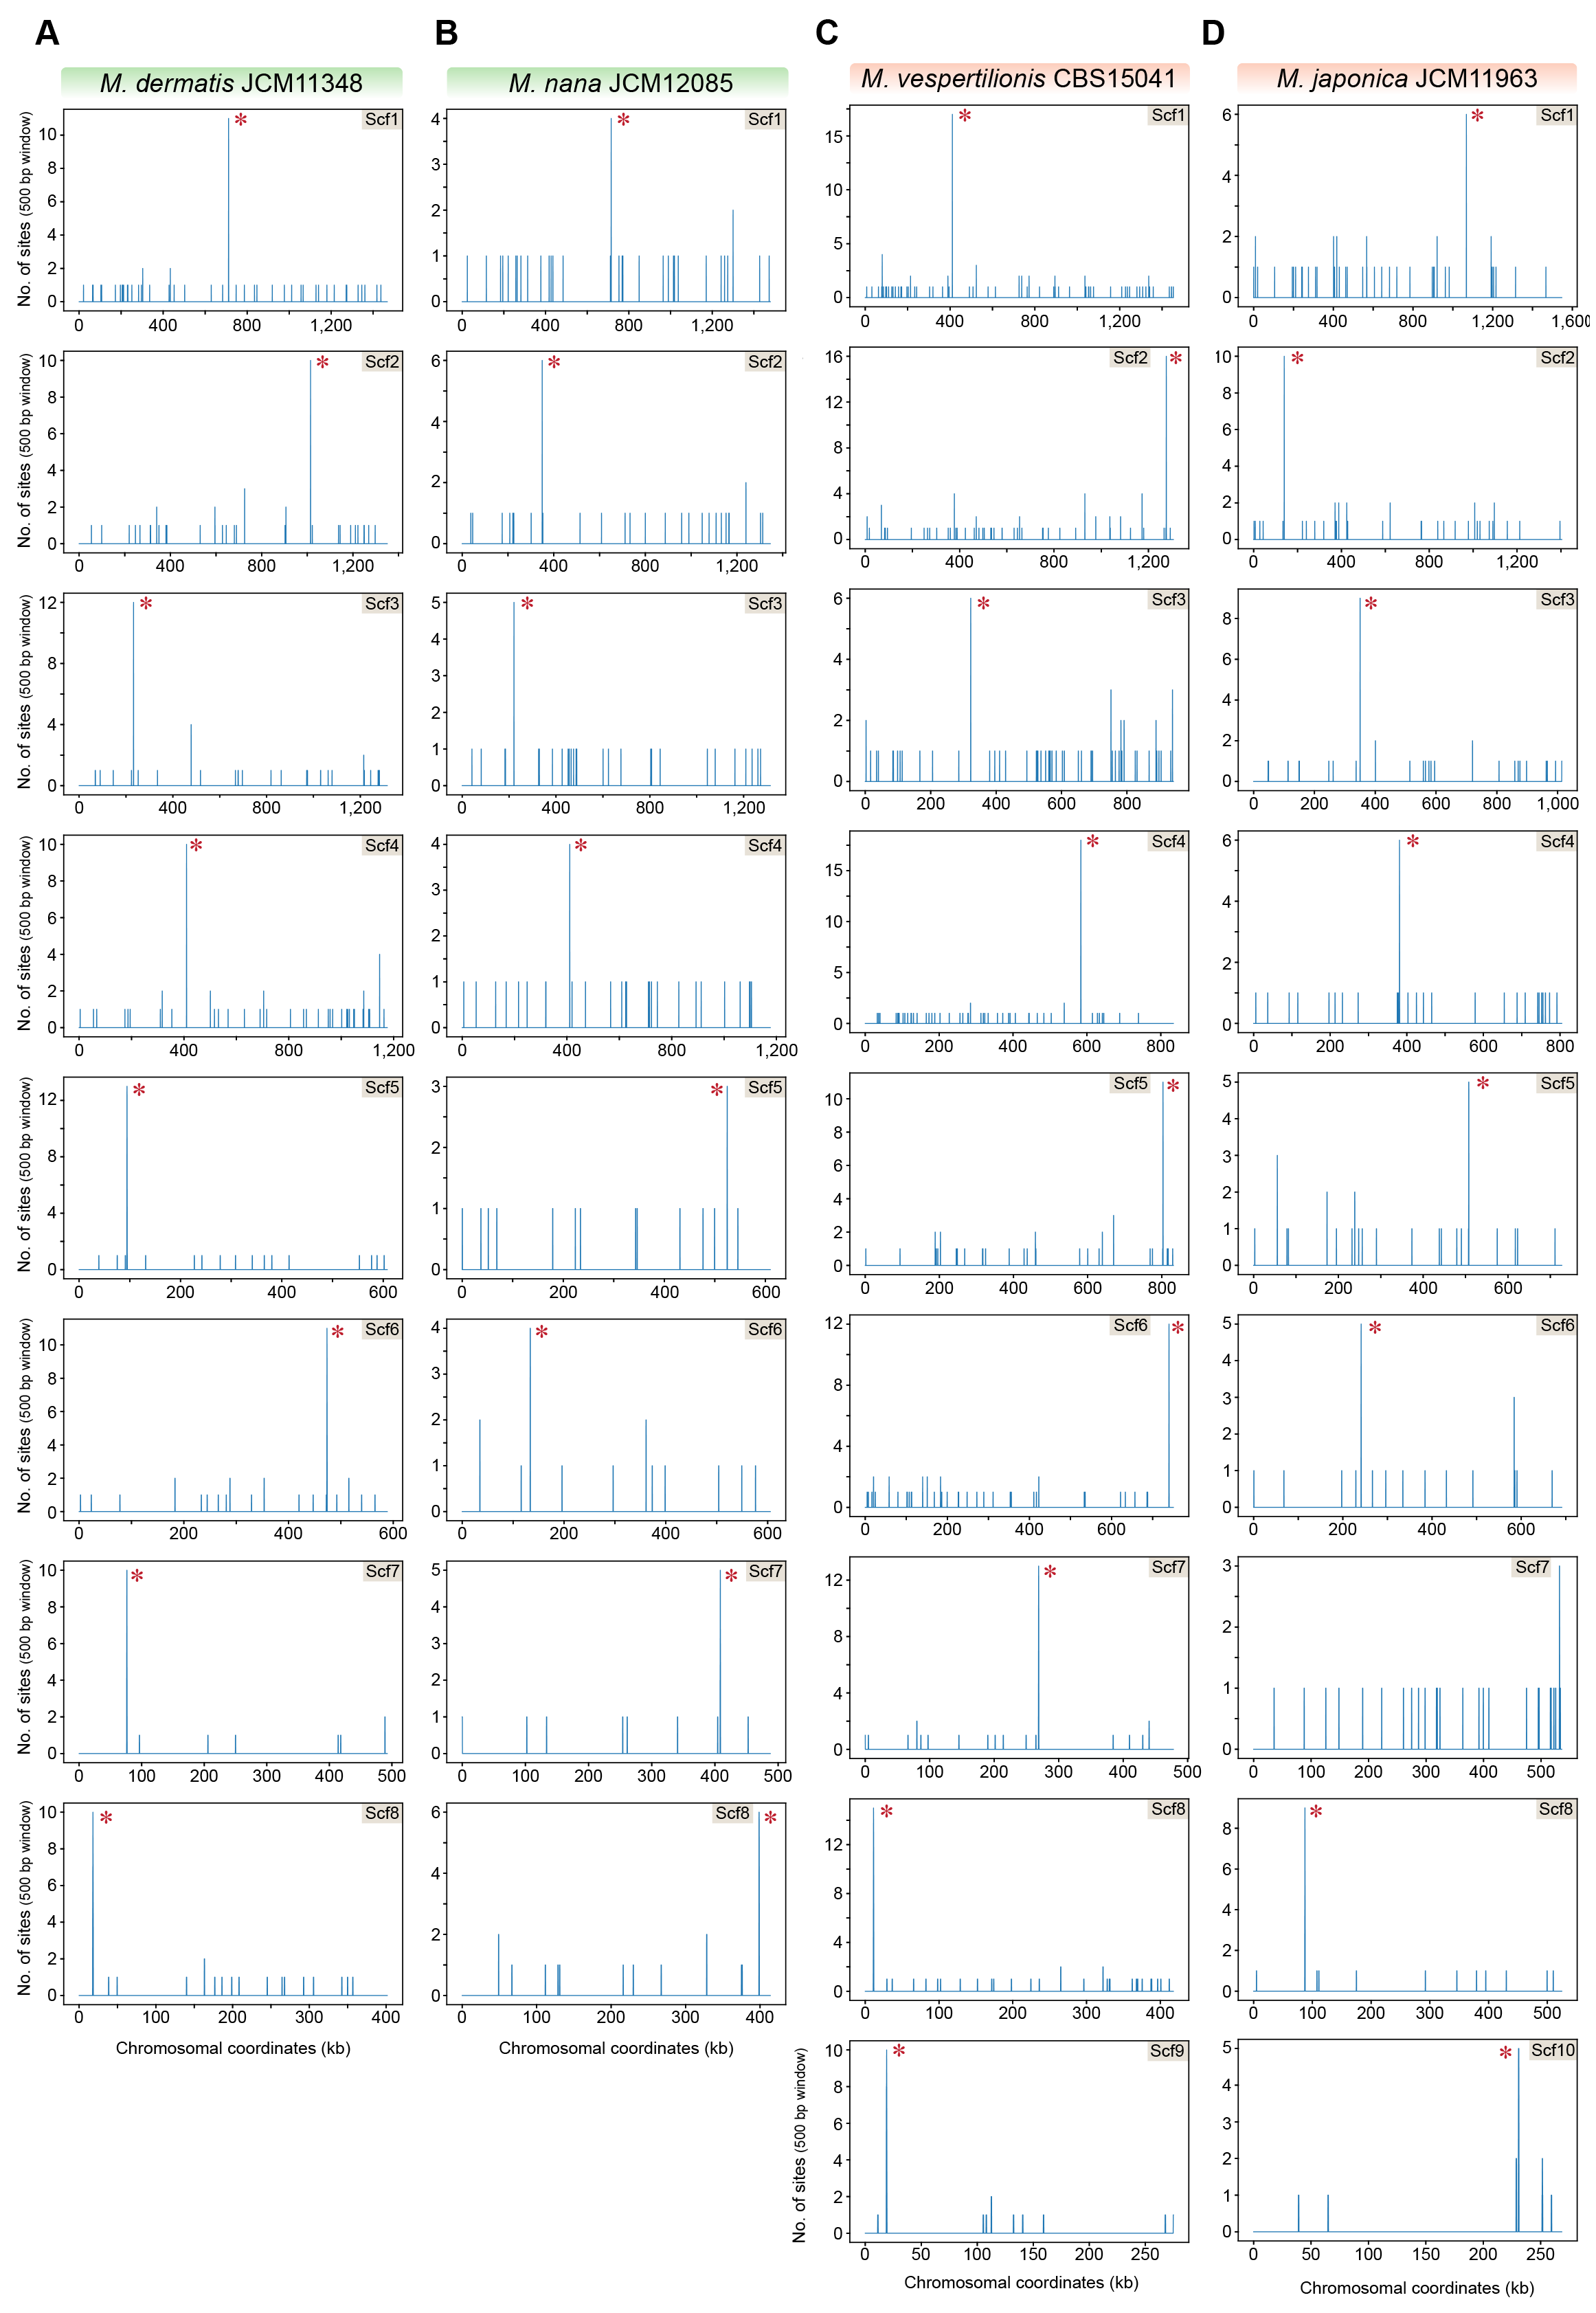

Supplement: supp [file elife-53944-supp-v1.zip › elife_poa_e53944_Figure_7_figure_supplement_2.tif]

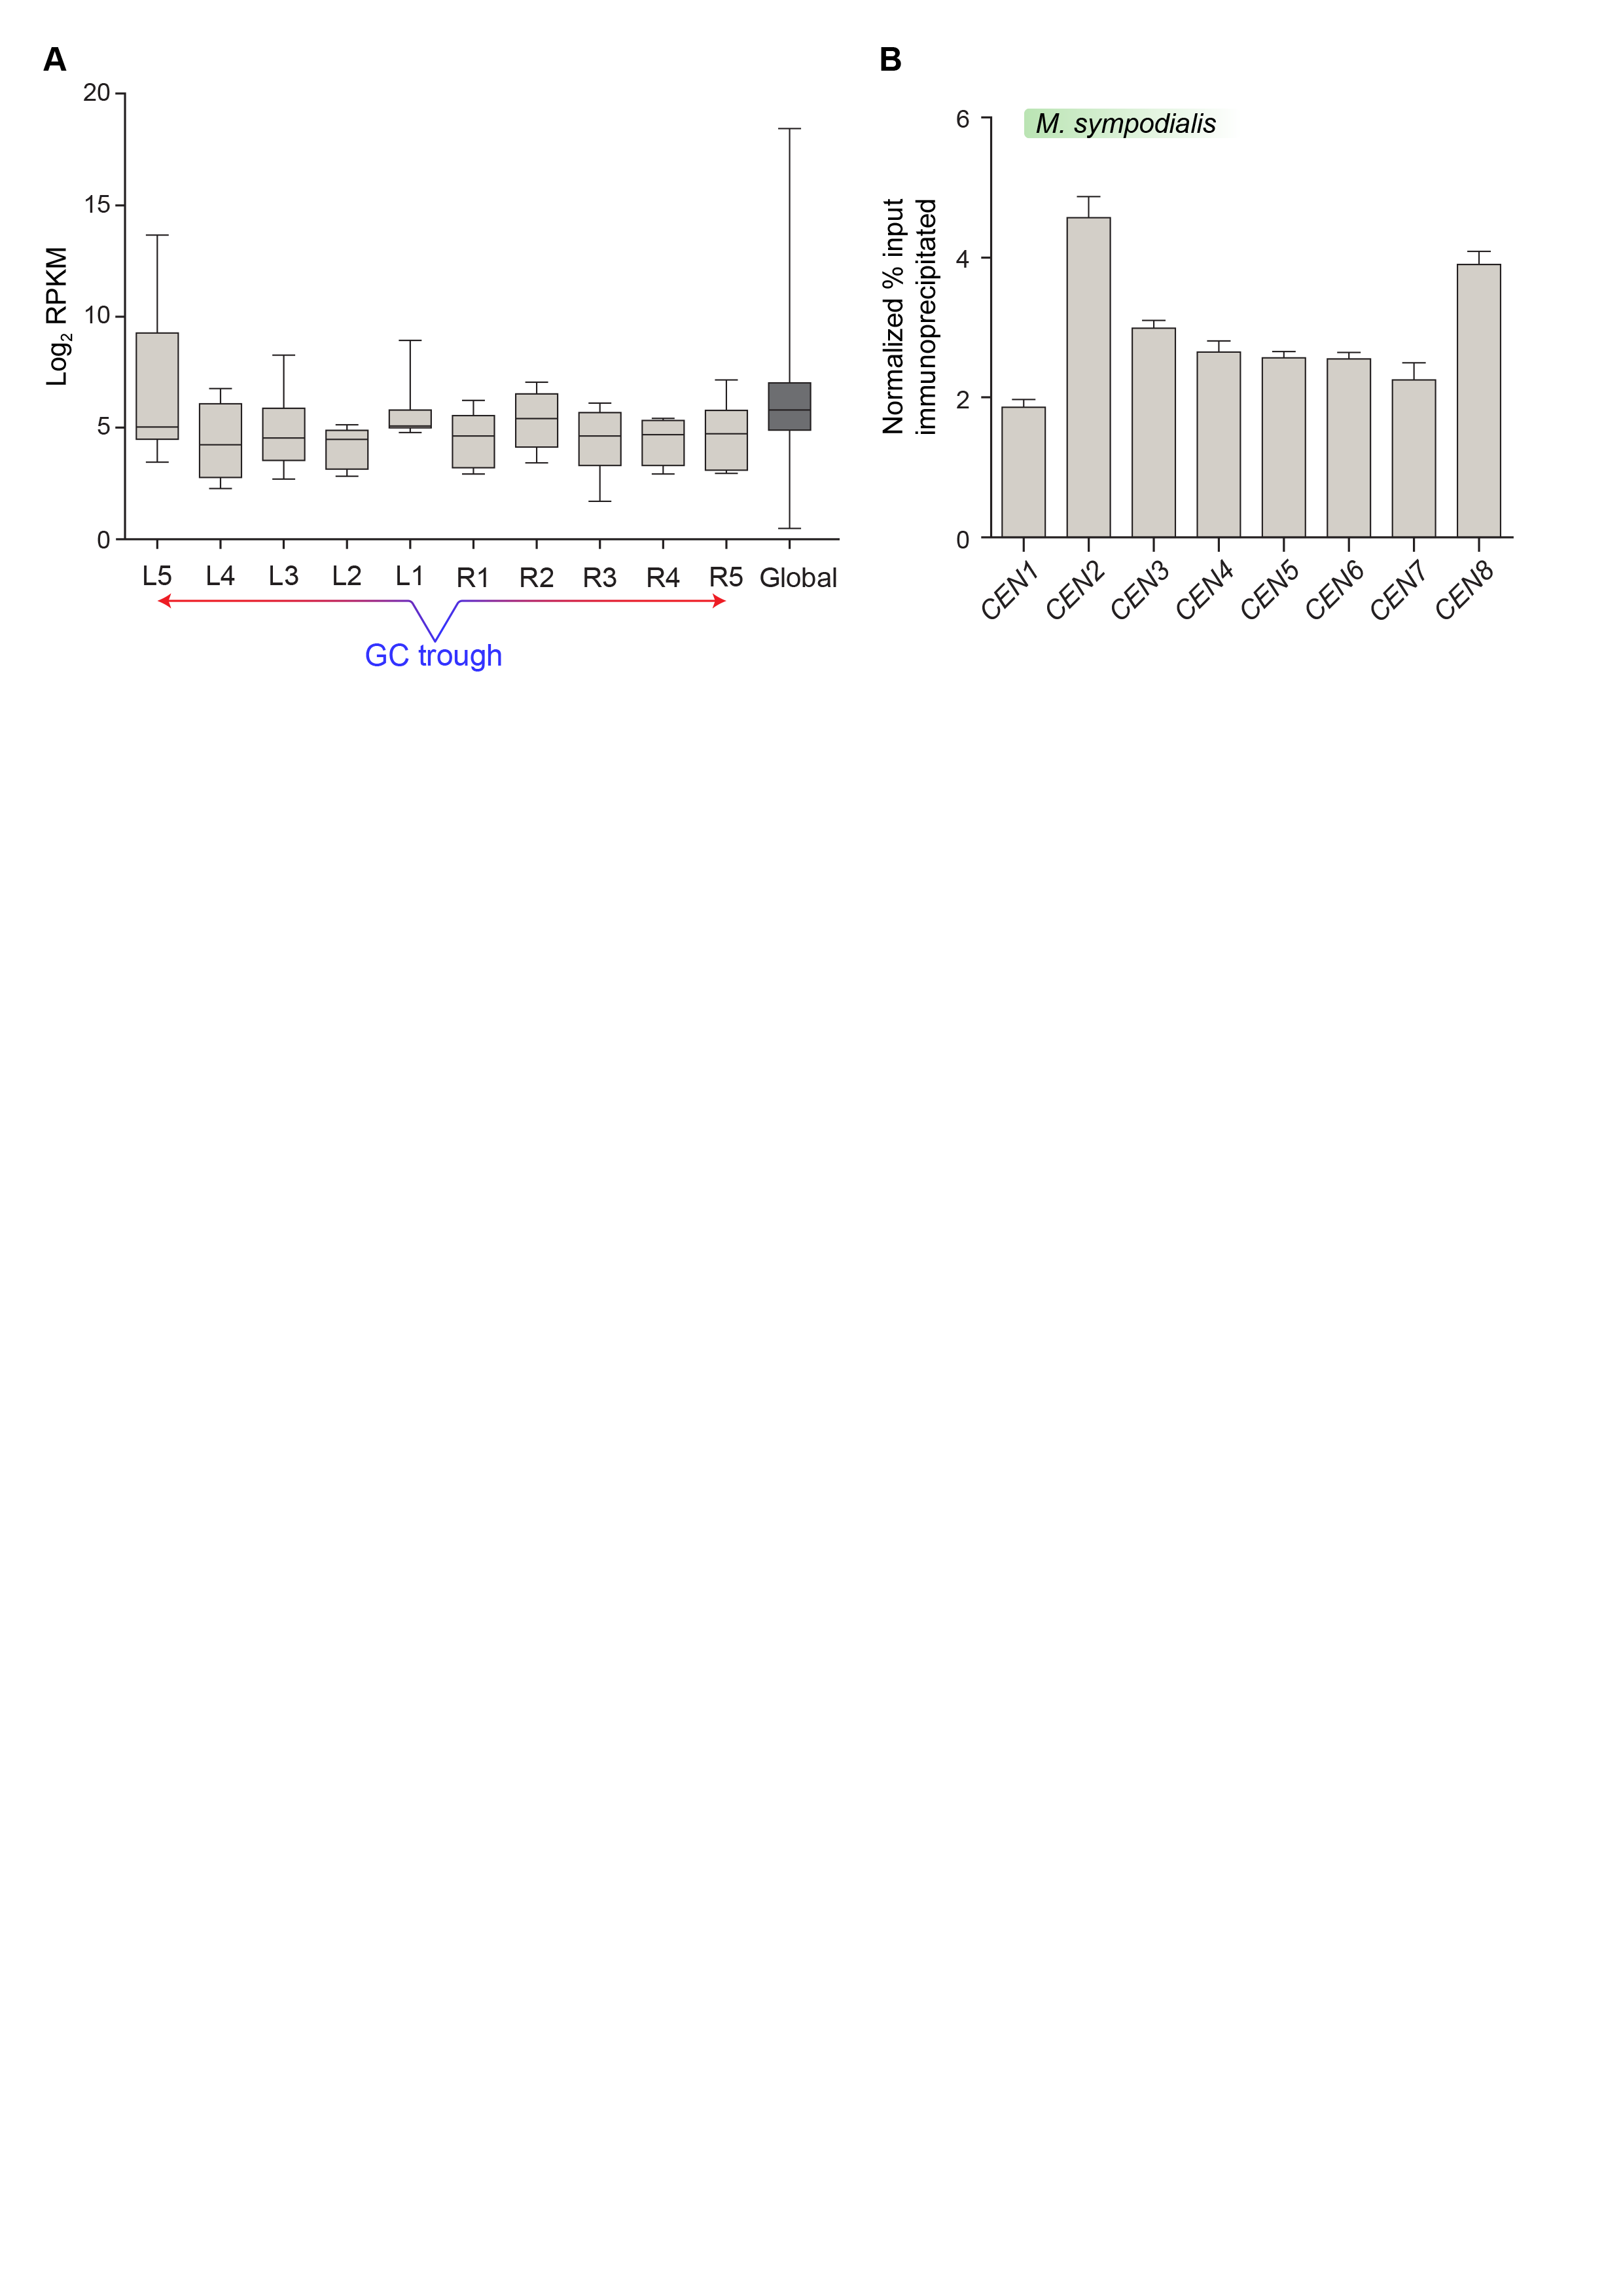

Supplement: supp [file elife-53944-supp-v1.zip › elife_poa_e53944_Figure_3_figure_supplement_1.tif]

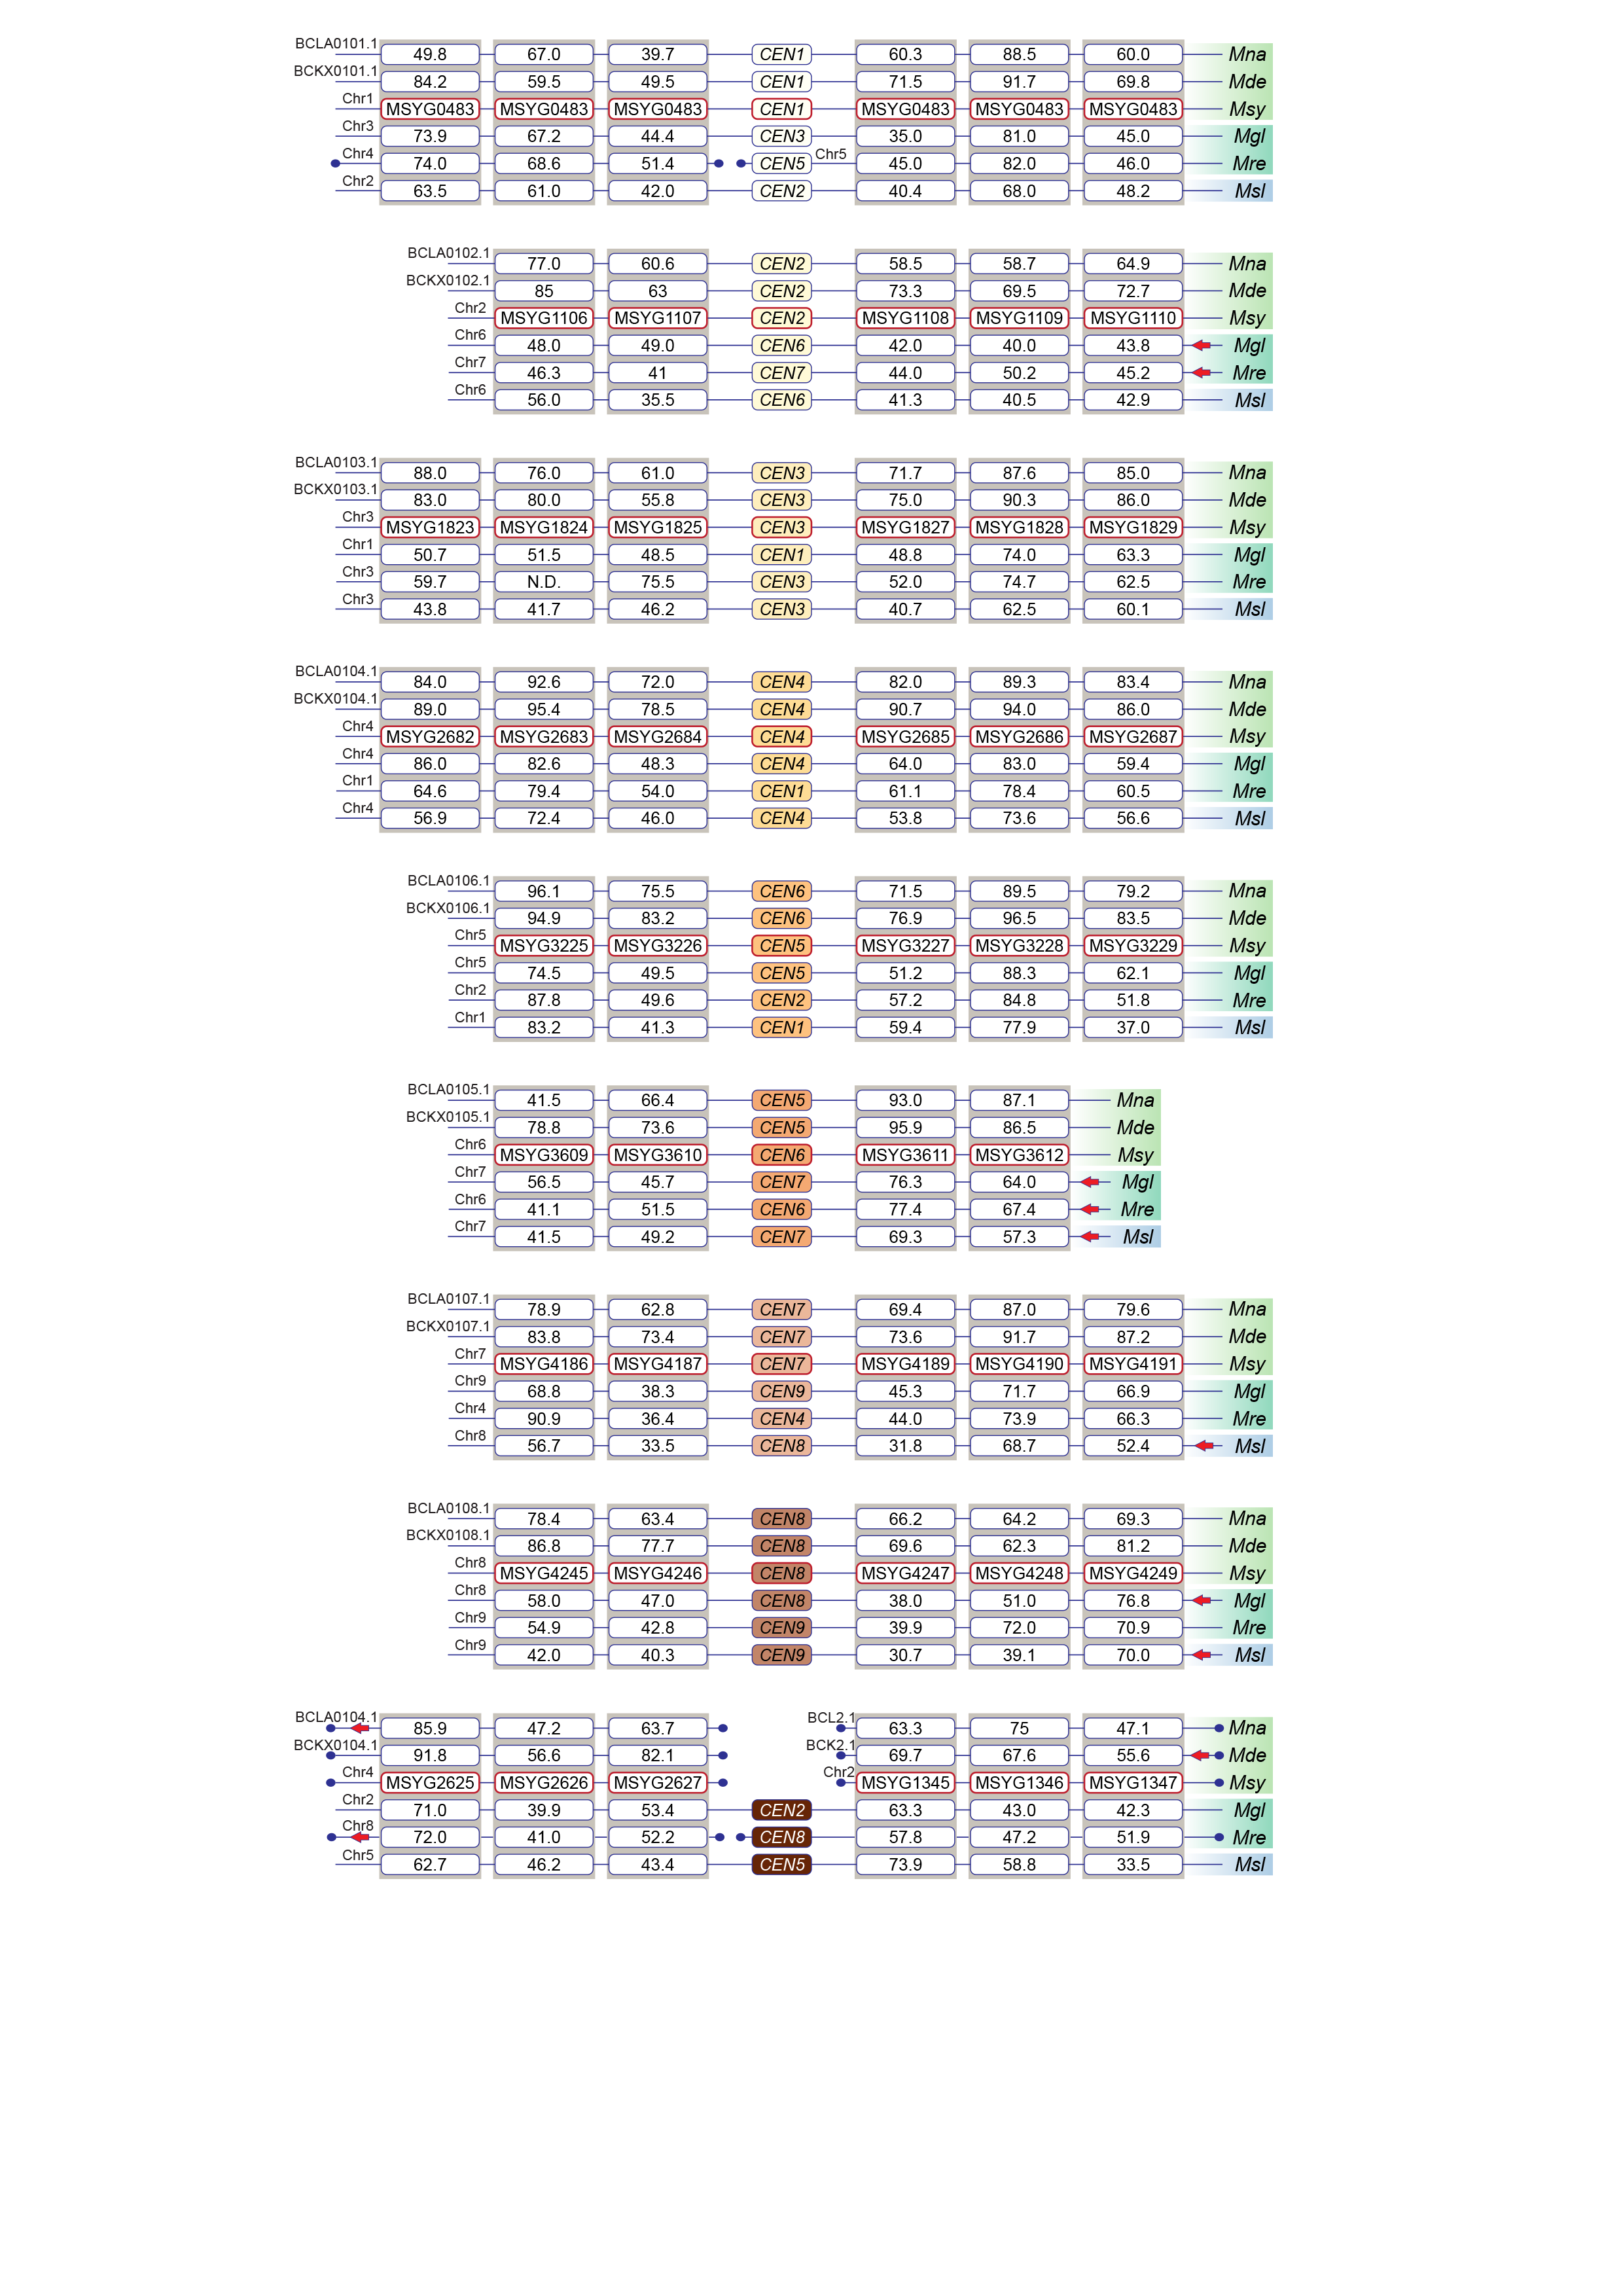

Supplement: supp [file elife-53944-supp-v1.zip › elife_poa_e53944_Figure_7_figure_supplement_3.tif]

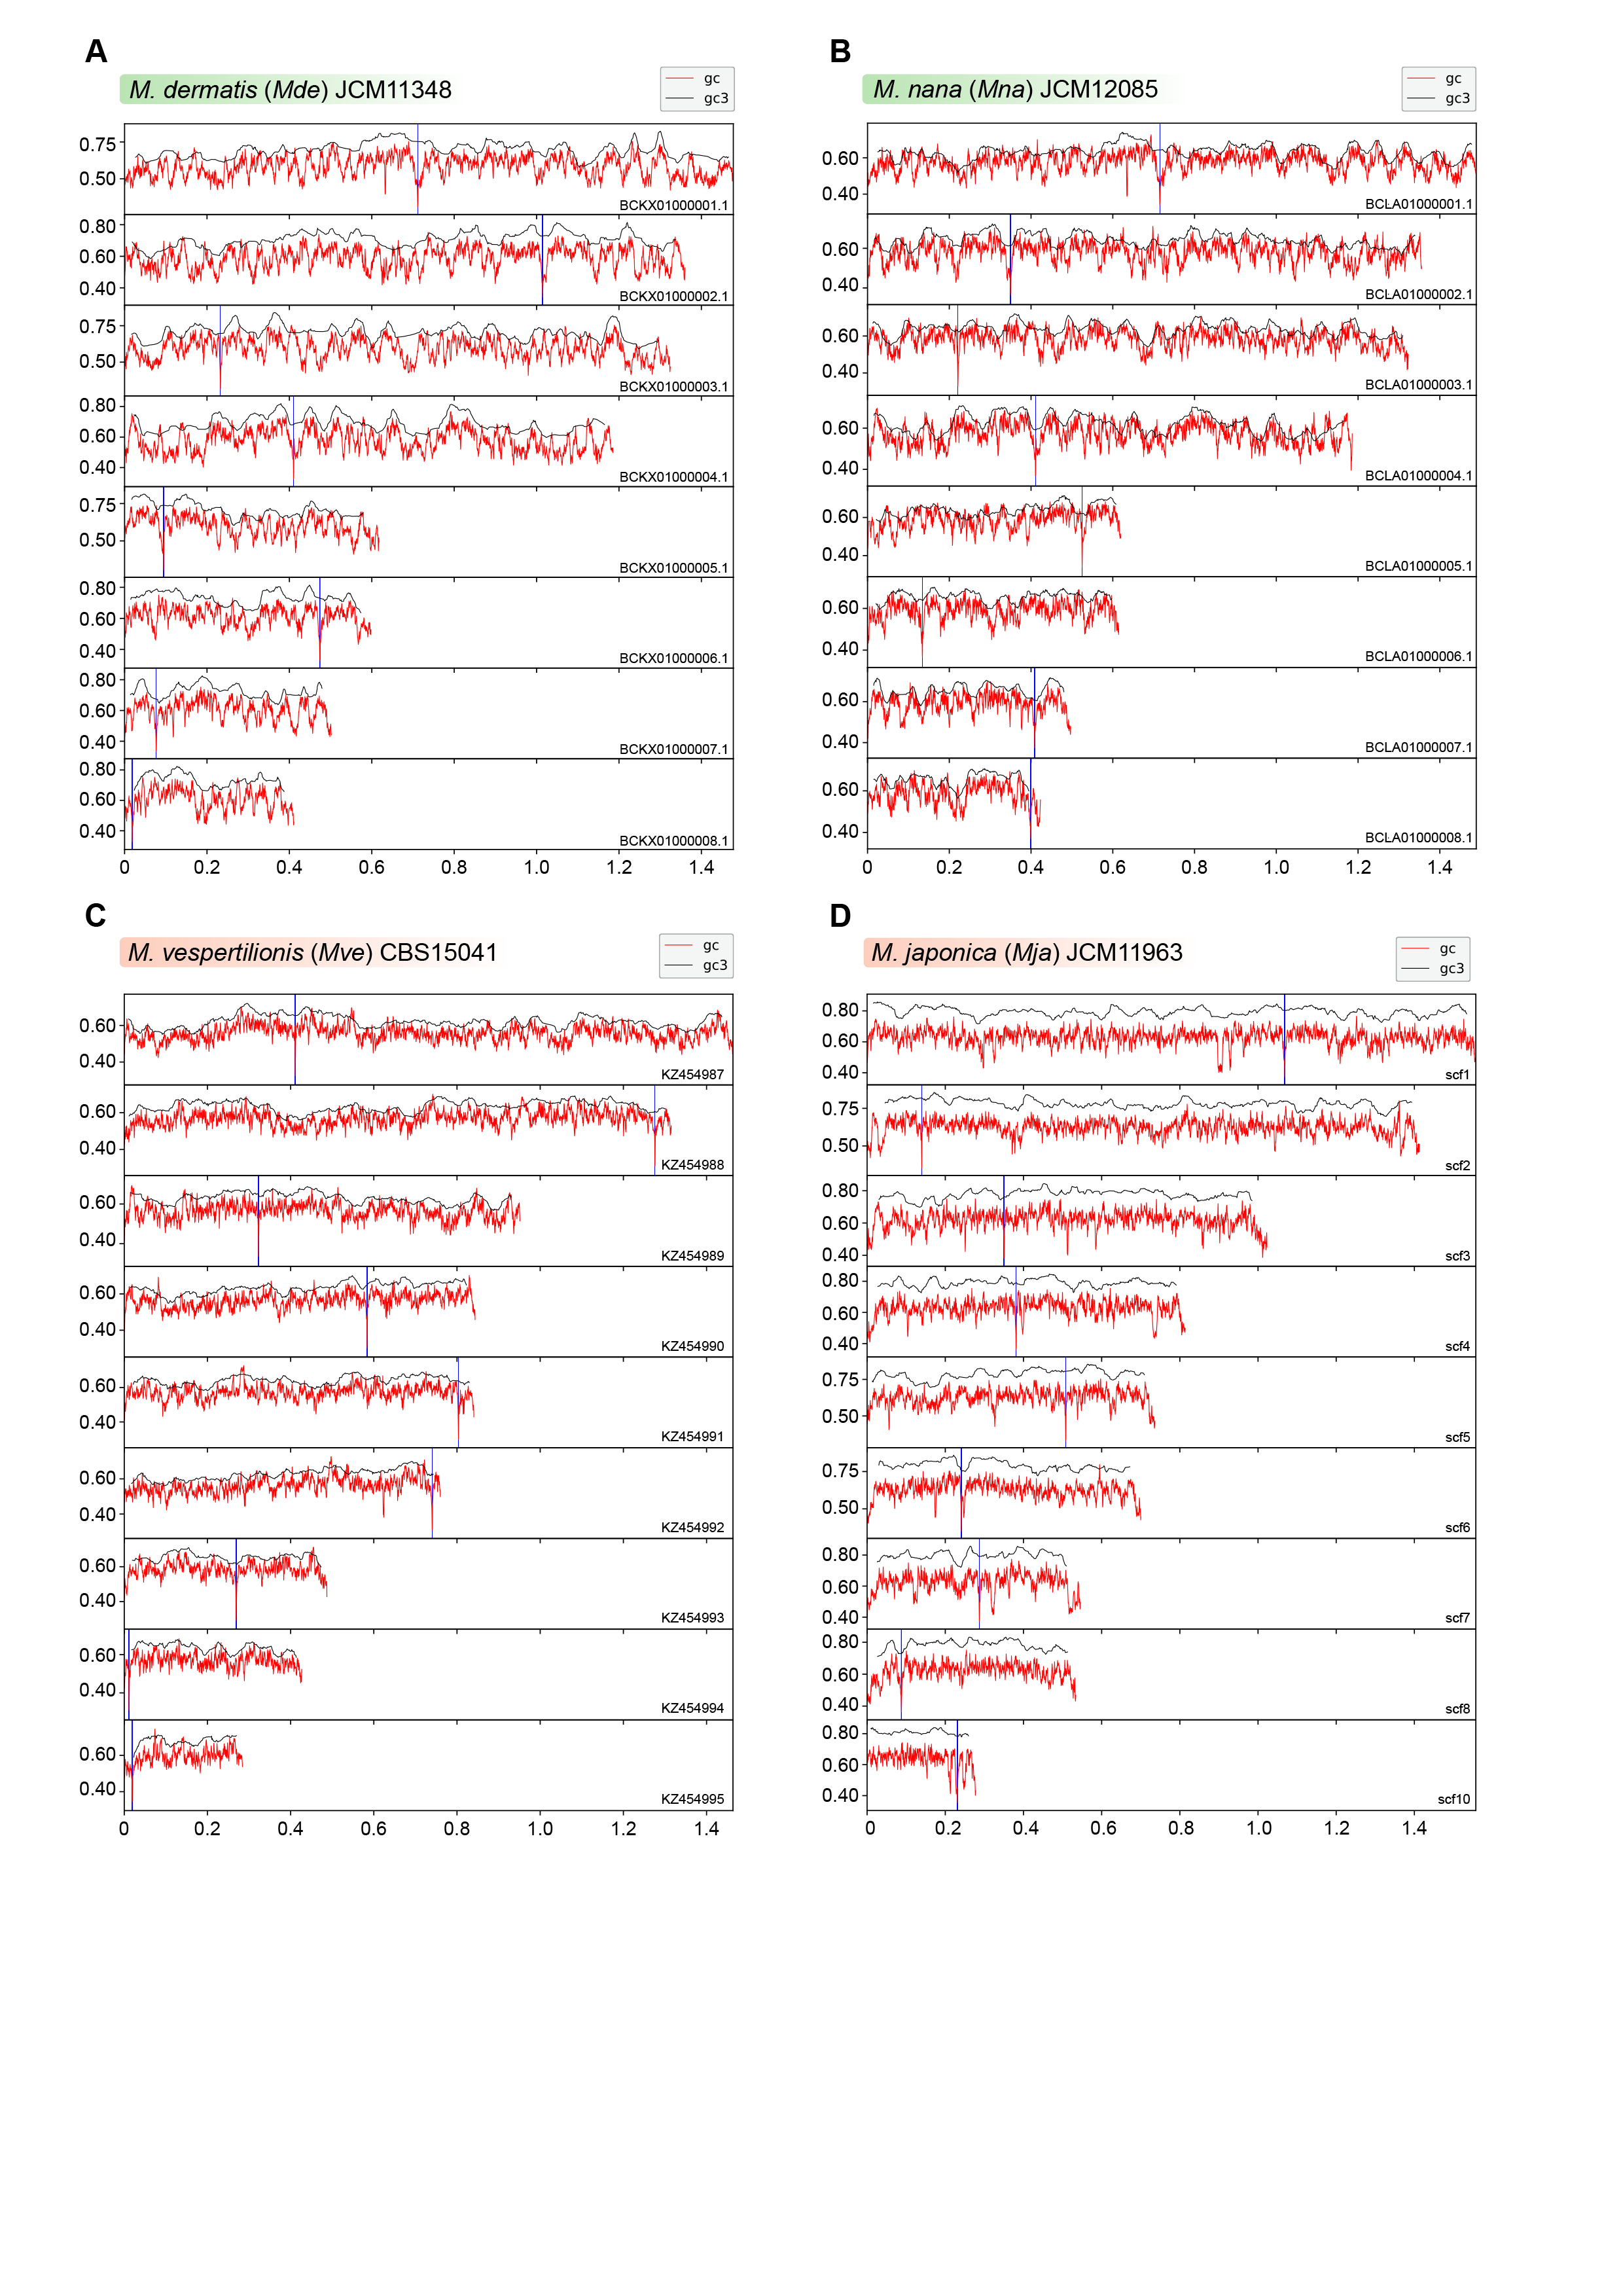

Supplement: supp [file elife-53944-supp-v1.zip › elife_poa_e53944_Figure_7_figure_supplement_1.tif]

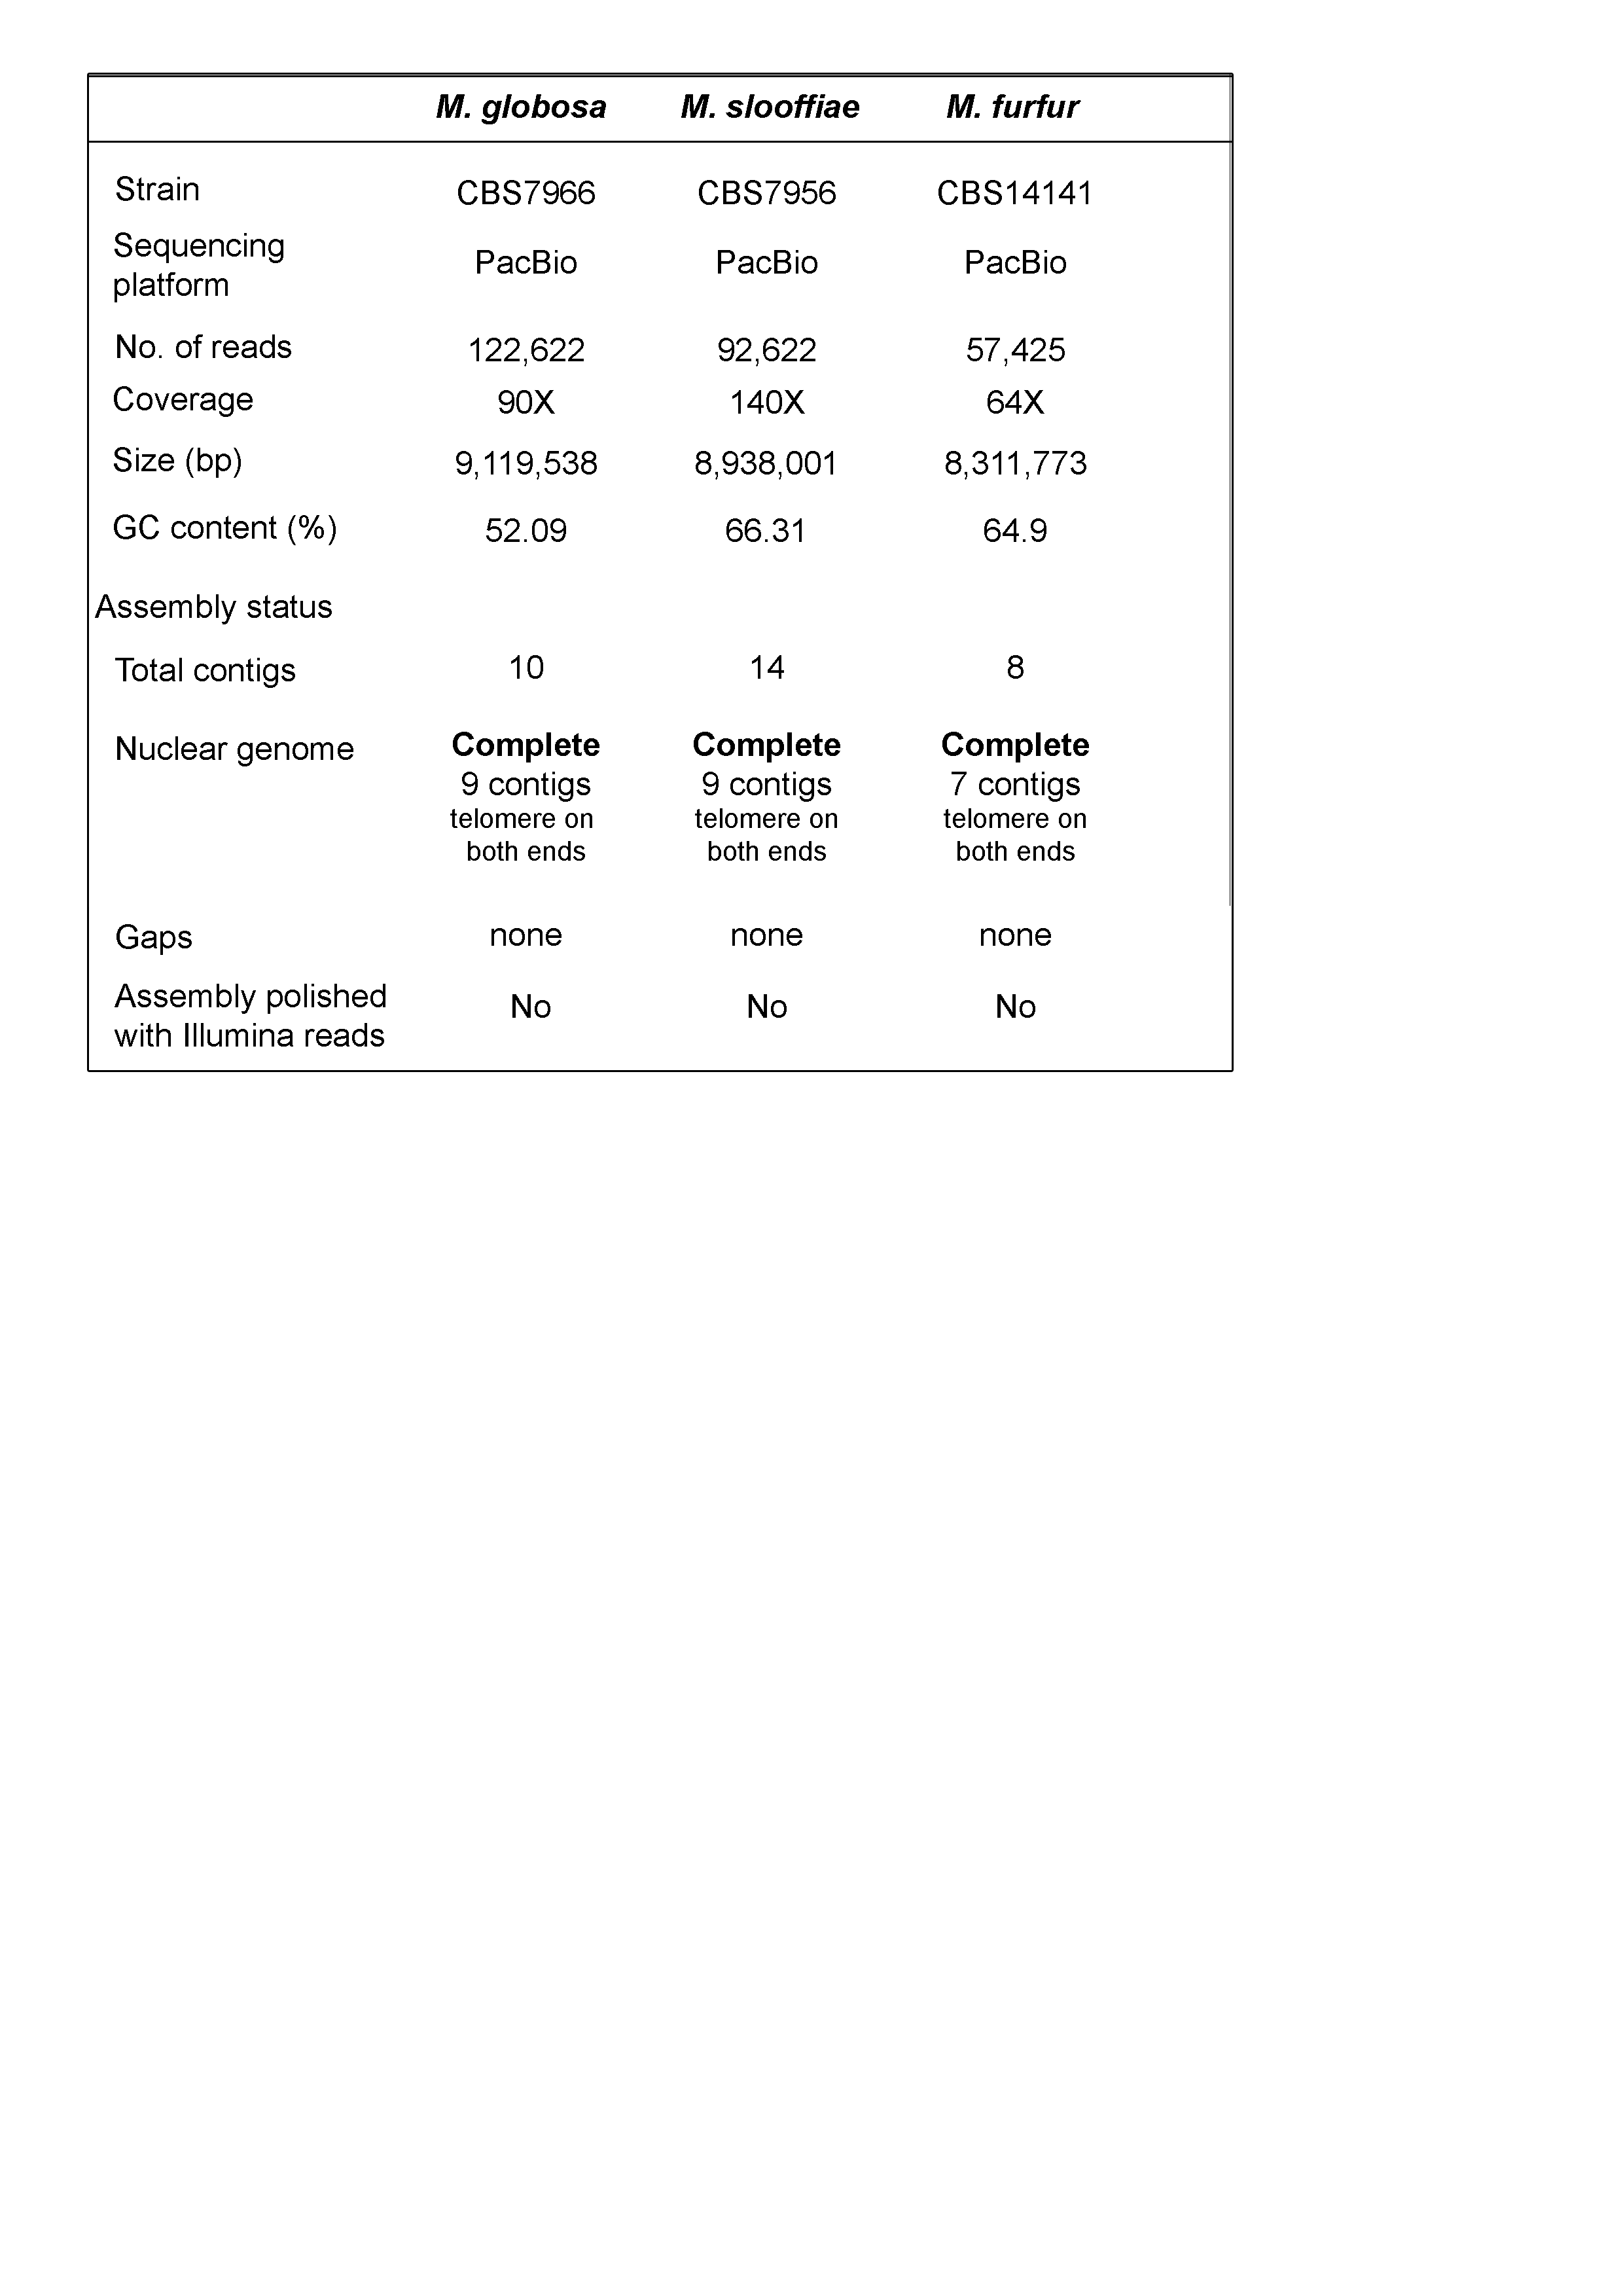

Supplement: supp [file elife-53944-supp-v1.zip › elife_poa_e53944_Figure_1_figure_supplement_1.tif]
